# Supplementary material
Source: MDPI journal article supplement (https://www.mdpi.com/2673-6756/2/1/14)
Supplement: s1 [file s1]

### A: Fabricated Organ Chart

**Patient Name:** Releaseone Organ  
**ABO:** -----

UNOS #: -----  
OPO #:  
MRN: 654321

# REFERRAL WORKSHEET

## HOSPITAL INFORMATION

**How did you learn of this case?** Donor Hospital Notification

Referral Taken By: Redacted Referral Date-Time: 04/06/2020 10:43 EDT

**Caller First:** [Redacted] **Last:** [Redacted] **Title:** PTC

Phone: \_\_\_\_\_ Ext.: \_\_\_\_\_

Referring Hospital: Code: OHAC

Unit: \_\_\_\_\_ Unit Detail: \_\_\_\_\_

**Special Instructions:**

IMPORTANT!!! Please Complete Release of Deceased Form and have it with you prior to taking patient to OR. - 5/30/2019

\*\*\*Family Members in OR on DCD. Hospital Policy is 2 members of the family only. If there is more than 2 family members OR has agreed to let family rotate in and out of OR\*\*\*\*\* - 5/30/2019

Coroner:

For release of deceased, please contact the referring unit (or if from ED, the Charge Nurse) and security (Redacted). Can call the unit first to give release then request to be transferred to Security.

Eligible for all Research for **Redacted**

Remote and onsite EMR Access available via CareLink [REDACTED]  
[REDACTED] Must use [REDACTED] if onsite - no system passwords are assigned to [REDACTED] staff so hospital computers cannot be used.

[illegible]

**\*\*Updated scrub process\*\*** The two scrub ex cards along with the locker room swipe access card will be located in the **Redacted** envelope in the lock box in the tall, cream colored cabinet behind the control desk. Please return all three cards in envelope to control desk once case is completed. Scrubs **MUST** be returned to the scrub ex machine using one of these cards as well. DO NOT simply deposit in dirty laundry as **Redacted** account will not be credited. **\*\***

Women's locker #72 - combination is **Redacted**; or in the men's locker #30 - combination is **Redacted**. Locker rooms are locked, but the swipe access card is available in the lock box in the tall, cream colored cabinet behind the Control Desk.

Organ Recovery OR:

Hospital has their own Balfour that will be used for all cases. Contact OR ASAP to notify of case and continue with updates on anticipated OR time. OR ext. Redacted. When OR time is scheduled, alert security alerted that team(s) will be arriving at the approximate time and will need escorted from the ED to the OR. Following the OR, communicate with OR staff to determine whether they or Redacted staff will be returning the patient's chart to the unit.

Infection Prevention Staff available 24-hours/day for review of potential donor's infection history: Redacted Redacted Redacted Redacted Redacted Redacted Redacted Redacted

**Hospital Services on Site?** --

**First Responder:** \_\_\_\_\_

## PATIENT INFORMATION

**Last Name:** Organ      **First:** Releaseone      **Middle:** -----

Nickname: \_\_\_\_\_

**DOB:** 02/20/1980      **Age:** 40 Years      **Sex:** Male

**Height:** ----- **Weight:** ----- **BMI:** -----

UNOS Donor ID: ----- MRN: 654321 SSN: 789-45-6123

**Race:** White: Not Specified/Unknown

Admission Date-Time: 04/05/2020 14:00 EDT

Referred on vent? Yes Referral Type: 0

|                                      |    |
|--------------------------------------|----|
| Removed from vent prior to referral? | No |
|--------------------------------------|----|

## Previously on a vent?

Date-Time of Extubation: --/--/---- --:--

**Date Generated:** 04/28/2020 10:47 EDT

Version #: 2020.1.0.1032

## Referral Worksheet

Report Page:

**Staff Completing:**

Page 1 of 2

Page 1 of 56

Patient Name: Releaseone Organ UNOS #: -----  
ABO: ----- OPO #: -----  
MRN: 654321

REFERRAL WORKSHEET

Was Referral Timely For Organ Donation? Yes  
Was Referral Timely For Tissue Donation? --  
Clinical Trigger Met Date-Time: --/--/--- --:--  
UNOS Cause of Death: Anoxia If Other, Specify: -----  
OPO Cause of Death: -----  
Circumstances of Death: ----- Mechanism of Death: -----  
Admission Diagnosis: Acute respiratory failure 2/2 pancreatitis  
Clinical Course/Circumstances Surrounding Death:  
Weight 100 kg  
History of... HIV? No HBV? No HCV? No Sepsis? No IVDA? No  
Signs/symptoms of systemic infection? --  
Donor Designation: Not Available: Minor child  
Downtime information: -----  
Approach Prior to Referral: ☐  
Att. MD: ----- Is the patient listed under trauma service? -----  
Missed Organ Potential (For QS/MRR staff use Only): ☐

PRELIMINARY TISSUE SCREENING INFORMATION

Death Date-Time: --/--/--- --:-- Whole Body Referral: ☐  
IV fluid given in the last hour? --  
Blood given in the last 48 hours? --  
Person contacted NOT to release the body: -- Name: -----

M.E. INFORMATION

M.E. Case? ----- Contact Name: ----- Contact Phone: -----  
Autopsy: -----  
Restrictions / Denial reason(s): -----  
M.E./Other Special Requests: -----

Patient Name: Releaseone Organ  
ABO: -----

UNOS #: -----  
OPO #: -----

MRN: 654321

## CL6.0A DRAI – DONOR > 12 YEARS OLD 01-01-2015 - #1

|                                                                                                                                                                                                                                                                                                                                                       |                                                     |                                                                                                                                                                                                                               |                      |
|-------------------------------------------------------------------------------------------------------------------------------------------------------------------------------------------------------------------------------------------------------------------------------------------------------------------------------------------------------|-----------------------------------------------------|-------------------------------------------------------------------------------------------------------------------------------------------------------------------------------------------------------------------------------|----------------------|
| Donor Name:                                                                                                                                                                                                                                                                                                                                           | Releaseone Organ                                    |                                                                                                                                                                                                                               |                      |
| Place of Interview:                                                                                                                                                                                                                                                                                                                                   | Hospital                                            | Date-Time Interviewed:                                                                                                                                                                                                        | 04/13/2020 18:10 EDT |
| Person Conducting Interview and Completing Form:                                                                                                                                                                                                                                                                                                      |                                                     |                                                                                                                                                                                                                               |                      |
| Person Interviewed:                                                                                                                                                                                                                                                                                                                                   | John Doe                                            | Relationship to Potential Donor:                                                                                                                                                                                              | Spouse               |
| Address:                                                                                                                                                                                                                                                                                                                                              | 123 Cherry Lane<br>Akron, OH 44312<br>United States |                                                                                                                                                                                                                               |                      |
| Phone:                                                                                                                                                                                                                                                                                                                                                | 330-987-6543                                        | Phone Type:                                                                                                                                                                                                                   | Cell                 |
| E-Mail:                                                                                                                                                                                                                                                                                                                                               | johndoe@email.com                                   |                                                                                                                                                                                                                               |                      |
| Person Interviewed:                                                                                                                                                                                                                                                                                                                                   | -----                                               | Relationship to Potential Donor:                                                                                                                                                                                              | -----                |
| Address:                                                                                                                                                                                                                                                                                                                                              | -----                                               |                                                                                                                                                                                                                               |                      |
| Phone:                                                                                                                                                                                                                                                                                                                                                | -----                                               | Phone Type:                                                                                                                                                                                                                   | -----                |
| E-Mail:                                                                                                                                                                                                                                                                                                                                               | -----                                               |                                                                                                                                                                                                                               |                      |
| I want to advise you of the sensitive and personal nature of some of these questions. They are similar to those asked when someone donates blood. We ask these questions for the health of those who may receive her/his* gift of donation. I will read each question and you will need to answer to the best of your knowledge with a "Yes" or "No." |                                                     |                                                                                                                                                                                                                               |                      |
| * The interviewer should mix the appropriate pronoun with other terms with which the historian can relate: the donor's given name; their nickname; inserting "your" father, mother, husband, wife, sister, brother, daughter, son, or child (as indicated).                                                                                           |                                                     |                                                                                                                                                                                                                               |                      |
| 1. Where was she/he* born?<br>Ohio                                                                                                                                                                                                                                                                                                                    |                                                     |                                                                                                                                                                                                                               |                      |
| 2. What was her/his* occupation?<br>Wife                                                                                                                                                                                                                                                                                                              |                                                     |                                                                                                                                                                                                                               |                      |
| 3. Did she/he* have any health problems due to exposure to toxic substances such as pesticides, lead, mercury, gold, asbestos, agent orange, etc.?                                                                                                                                                                                                    | No                                                  | 3a. Describe toxic substance and treatment.<br>-----                                                                                                                                                                          |                      |
| 4a. Did she/he* have a family physician or a specialist?                                                                                                                                                                                                                                                                                              | Yes                                                 | 4a(i). When was her/his* last visit?<br>Last Week<br>4a(ii). Why?<br>Cough<br>4a(iii). Provide any contact information (e.g., name, group, facility, phone number, etc.):<br>Dr James                                         |                      |
| 4b. Did she/he* use a medical facility such as a clinic or urgent care center?                                                                                                                                                                                                                                                                        | Yes                                                 | 4b(i). When was her/his* last visit?<br>Last Week<br>4b(ii). Why?<br>Cough<br>4b(iii). Provide any contact information (e.g., name, group, facility, phone number, etc.):<br>Stat Care                                        |                      |
| 5a. Did she/he* take any prescription medication recently or on a regular basis?                                                                                                                                                                                                                                                                      | No                                                  | 5a(i). What was it and/or what was it used for?<br>-----<br>Was a steroid, such as prednisone named?<br>-----<br>If a steroid, such as prednisone, ask:<br>5a(ii). How long?<br>-----<br>5a(iii). What was the dose?<br>----- |                      |

Date Generated: 04/28/2020 10:47 EDT CL6.0A DRAI – Donor > 12 years old Page 1 of 12

01-01-2015

Version #: 2020.1.0.1032

Report Page: Page 3 of 56

Staff Completing:

64

Patient Name: Releaseone Organ  
ABO: -----

UNOS #: -----  
OPO #: -----

MRN: 654321

## CL6.0A DRAI – DONOR > 12 YEARS OLD 01-01-2015 - #1

|                                                                                                                                                                                    |     |                                                                                                 |
|------------------------------------------------------------------------------------------------------------------------------------------------------------------------------------|-----|-------------------------------------------------------------------------------------------------|
| 5b. Did she/he* take any non-prescribed medication or dietary supplements?                                                                                                         | No  | 5b(i). What was it and/or what was it used for?<br>-----                                        |
| 6. Did she/he* recently have any symptoms such as:<br><i>If any answer in question 6. is "yes," ask "when" this occurred <u>and</u> "describe symptoms and reasons," if known.</i> |     |                                                                                                 |
| 6a. a fever?                                                                                                                                                                       | No  | 6a(i). When?<br>-----<br>6a(ii). Describe the fever and reasons.<br>-----                       |
| 6b. cough?                                                                                                                                                                         | Yes | 6b(i). When?<br>Last Week<br>6b(ii). Describe the cough and reasons.<br>Dry Hoarse, chest cold  |
| 6c. diarrhea?                                                                                                                                                                      | No  | 6c(i). When?<br>-----<br>6c(ii). Describe diarrhea and reasons.<br>-----                        |
| 6d. swollen lymph nodes or glands in the neck, armpits or groin?                                                                                                                   | No  | 6d(i). When?<br>-----<br>6d(ii). Describe swollen lymph nodes or glands and reasons.<br>-----   |
| 6e. weight loss?                                                                                                                                                                   | No  | 6e(i). When?<br>-----<br>6e(ii). Describe how much weight loss and reason(s).<br>-----          |
| 6f. a rash?                                                                                                                                                                        | No  | 6f(i). When?<br>-----<br>6f(ii). Describe the rash and reasons.<br>-----                        |
| 6g. sores in the mouth or on the skin?                                                                                                                                             | No  | 6g(i). When?<br>-----<br>6g(ii). Describe the sores and reasons.<br>-----                       |
| 6h. night sweats?                                                                                                                                                                  | No  | 6h(i). When?<br>-----<br>6h(ii). Describe night sweats and reasons.<br>-----                    |
| 6i. severe headache?                                                                                                                                                               | No  | 6i(i). When?<br>-----<br>6i(ii). Describe the severe headache and reasons.<br>-----             |
| 6j. rapid decline in mental ability?                                                                                                                                               | No  | 6j(i). When?<br>-----<br>6j(ii). Describe rapid decline in mental ability and reasons.<br>----- |

Date Generated: 04/28/2020 10:47 EDT CL6.0A DRAI – Donor > 12 years old Page 2 of 12

01-01-2015

Version #: 2020.1.0.1032

Report Page:

Page 4 of 56

Staff Completing:

65

Patient Name: Releaseone Organ  
ABO: -----

UNOS #: -----  
OPO #:

MRN: 654321

## CL6.0A DRAI – DONOR > 12 YEARS OLD 01-01-2015 - #1

|                                                                                                             |     |                                                                                                                                                                                                                                                                                                                                                                                                                                                                                                                                                                        |
|-------------------------------------------------------------------------------------------------------------|-----|------------------------------------------------------------------------------------------------------------------------------------------------------------------------------------------------------------------------------------------------------------------------------------------------------------------------------------------------------------------------------------------------------------------------------------------------------------------------------------------------------------------------------------------------------------------------|
| 6k. seizures?                                                                                               | No  | 6k(i). When?<br>-----<br>6k(ii). Describe seizures and reasons.<br>-----                                                                                                                                                                                                                                                                                                                                                                                                                                                                                               |
| 6l. tremors?                                                                                                | No  | 6l(i). When?<br>-----<br>6l(ii). Describe tremors and reasons.<br>-----                                                                                                                                                                                                                                                                                                                                                                                                                                                                                                |
| 6m. difficulty walking?                                                                                     | No  | 6m(i). When?<br>-----<br>6m(ii). Describe difficulty walking and reasons.<br>-----                                                                                                                                                                                                                                                                                                                                                                                                                                                                                     |
| 7. Did she/he* have any allergies?                                                                          | Yes | 7a. What was she/he* allergic to?<br>Pollen<br>7b. Describe reaction:<br>Sneezing                                                                                                                                                                                                                                                                                                                                                                                                                                                                                      |
| 8. Did she/he* know anyone who had a smallpox vaccination?                                                  | No  | 8a. Was <b>that person</b> vaccinated within the past two months?<br>-----<br>8a(i). <i>If yes,</i><br>Did she/he* have contact with this person which includes touching the vaccination site, handling bandages that cover it, or handling bedding, clothing, or any other material that came in contact with the vaccination site?<br>-----<br>8a(i)a. <i>If yes,</i><br>Did she/he* experience any symptoms or complications such as a rash, fever, muscle aches, headaches, nausea, or eye involvement?<br>-----<br>8a(i)a(i). <i>If yes,</i><br>Explain:<br>----- |
| 9. In the past <b>12 months</b> was she/he* in lockup, jail, prison, or any juvenile correctional facility? | No  | 9a. How long?<br>-----<br>9b. Where?<br>-----<br>9c. Why?<br>-----                                                                                                                                                                                                                                                                                                                                                                                                                                                                                                     |
|                                                                                                             |     |                                                                                                                                                                                                                                                                                                                                                                                                                                                                                                                                                                        |

Date Generated: 04/28/2020 10:47 EDT CL6.0A DRAI – Donor > 12 years old Page 3 of 12

01-01-2015

Version #: 2020.1.0.1032

Report Page:

Page 5 of 56

Staff Completing:

66

Patient Name:Releaseone Organ

ABO:-----

UNOS #:-----

OPO #:-----

MRN:654321

LAB PROFILE - URINALYSIS

|                                |                  |
|--------------------------------|------------------|
| Date-Time                      | --/--/---- --:-- |
| Color                          | -----            |
| Appearance                     | -----            |
| pH                             | -----            |
| Spec. Grav.                    | -----            |
| Protein                        | -----            |
| Glucose                        | -----            |
| Blood                          | -----            |
| RBC                            | -----            |
| WBC                            | -----            |
| Ketones                        | -----            |
| Casts                          | -----            |
| Bacteria                       | -----            |
| Epith                          | -----            |
| Leukocyte                      | -----            |
| Albumin/Creatinine Ratio (ACR) | -----            |
| -----                          | -----            |
| -----                          | -----            |

Comments:  
-----

Patient Name: Releaseone Organ  
ABO: -----

UNOS #: -----  
OPO #: -----

MRN: 654321

## CL6.0A DRAI – DONOR > 12 YEARS OLD 01-01-2015 - #1

|                                                                                                                                                         |           |                                                                                                                                                                                                                                                                                                                                                                                                                                                                                                                                                                |
|---------------------------------------------------------------------------------------------------------------------------------------------------------|-----------|----------------------------------------------------------------------------------------------------------------------------------------------------------------------------------------------------------------------------------------------------------------------------------------------------------------------------------------------------------------------------------------------------------------------------------------------------------------------------------------------------------------------------------------------------------------|
| <p>10. In the past <b>12 months</b> was she/he* bitten or scratched by any pet, stray, farm, or wild animal?</p>                                        | <p>No</p> | <p>10a. What kind of animal?<br/>-----</p> <p>10b. When?<br/>-----</p> <p>10c. Did she/he* receive any medical treatment?<br/>-----</p> <p>10c(i). <i>If yes,</i><br/>By whom?<br/>-----</p> <p>10d. Was the animal suspected of having rabies?<br/>-----</p> <p>10e. Was the animal quarantined or tested?<br/>-----</p> <p>10e(i). Which one?<br/>-----</p> <p>10e(ii). <i>If yes to tested,</i><br/>What was the result?<br/>-----</p>                                                                                                                      |
| <p>11. In the past <b>12 months</b> was she/he* told by a healthcare professional that they had a West Nile virus infection?</p>                        | <p>No</p> | <p>11a. When was she/he* diagnosed?<br/>-----</p> <p><i>Did this occur within the past 4 months?</i><br/>-----</p> <p>11a(i). <i>If this occurred within the past 4 months ask:</i><br/>What was the name of the doctor/clinic?<br/>-----</p>                                                                                                                                                                                                                                                                                                                  |
| <p>12. In the past <b>12 months</b> did she/he* have any shots or immunizations, such as for the flu, MMR, yellow fever, hepatitis B, etc.?</p>         | <p>No</p> | <p>12a. When?<br/>-----</p> <p>12b. What kind was it?<br/>-----</p> <p><i>Was smallpox/vaccinia named?</i><br/>-----</p> <p><u><i>If smallpox/vaccinia is named, ask these questions:</i></u></p> <p>12b(i). Did she/he* experience any symptoms or complications such as a rash, fever, muscle aches, headaches, nausea, or eye involvement?<br/>-----</p> <p>12b(i)a. <i>If yes,</i><br/>When did these symptoms resolve?<br/>-----</p> <p>12b(ii). Did the scab <u>fall off</u> or was it <u>picked off</u>?<br/>-----</p> <p>12b(ii)a. When?<br/>-----</p> |
| <p><b>This is a reminder these are standard questions we ask in every interview.<br/>Answer to the best of your knowledge with a "Yes" or "No."</b></p> |           |                                                                                                                                                                                                                                                                                                                                                                                                                                                                                                                                                                |
|                                                                                                                                                         |           |                                                                                                                                                                                                                                                                                                                                                                                                                                                                                                                                                                |

Date Generated: 04/28/2020 10:47 EDT

CL6.0A DRAI – Donor > 12 years old 01-01-2015

Page 4 of 12

Version #: 2020.1.0.1032

Report Page:

Page 6 of 56

Staff Completing:

Patient Name: Releaseone Organ  
ABO: -----

UNOS #: -----  
OPO #: -----

MRN: 654321

## CL6.0A DRAI – DONOR > 12 YEARS OLD 01-01-2015 - #1

|                                                                                                                                                                                                                                                                            |    |                                                                                                                                                                                                                                                                             |
|----------------------------------------------------------------------------------------------------------------------------------------------------------------------------------------------------------------------------------------------------------------------------|----|-----------------------------------------------------------------------------------------------------------------------------------------------------------------------------------------------------------------------------------------------------------------------------|
| 13. In the past <b>12 months</b> did she/he* get a tattoo, touch up of an old tattoo, or permanent makeup?                                                                                                                                                                 | No | 13a. Were shared or non-sterile instruments, needles or ink used?<br>-----<br>13b. Was the procedure performed outside of the United States or Canada?<br>-----<br>13b(i). If yes,<br>Where?<br>-----                                                                       |
| 14. In the past <b>12 months</b> did she/he* have acupuncture, ear or body piercing?                                                                                                                                                                                       | No | 14a. Were shared or non-sterile instruments or needles used?<br>-----<br>14b. Was the procedure performed outside of the United States or Canada?<br>-----<br>14b(i). If yes,<br>Where?<br>-----                                                                            |
| 15a. In the past <b>12 months</b> did she/he* live with a person who has hepatitis?                                                                                                                                                                                        | No | 15a(i). What type of hepatitis did <b>that person</b> have?<br>-----<br>15a(ii). Was that person sick from the virus during that time, such as having abdominal pain, joint pain, exhaustion, fever, nausea, vomiting, diarrhea, or yellowing of the eyes or skin?<br>----- |
| 15b. In the past <b>12 months</b> did she/he* live with a person who has tuberculosis?                                                                                                                                                                                     | No | 15b(i). Describe what happened and when.<br>-----                                                                                                                                                                                                                           |
| 16. In the past <b>12 months</b> did she/he* come into contact with someone else's blood?                                                                                                                                                                                  | No | 16a. Describe what happened and when:<br>-----<br>16b. Was the other person involved known to have had, or suspected of having, HIV or hepatitis?<br>-----                                                                                                                  |
| 17. In the past <b>12 months</b> did she/he* have an accidental needle-stick?                                                                                                                                                                                              | No | 17a. Describe what happened and when:<br>-----<br>17b. Was the needle contaminated with blood from someone known to have had, or suspected of having, HIV or hepatitis?<br>-----                                                                                            |
| <b>As I described before, I want to remind you of the sensitive and personal nature of some of these questions. For medical and health reasons, we are required to ask these questions about all potential donors. Next, I will ask you about her/his* sexual history.</b> |    |                                                                                                                                                                                                                                                                             |
| 18. In the past <b>12 months</b> did she/he* have a sexually transmitted infection such as syphilis, gonorrhea, chlamydia, or genital ulcers, herpes, or genital warts?                                                                                                    | No | 18a. What was it?<br>-----                                                                                                                                                                                                                                                  |
| <b>For the next part, sexual activity and sex refer to any method of sexual contact including vaginal, anal, and oral.</b>                                                                                                                                                 |    |                                                                                                                                                                                                                                                                             |
| <b>I will read each question and you should answer to the best of your knowledge with a "Yes" or "No."</b>                                                                                                                                                                 |    |                                                                                                                                                                                                                                                                             |
| 19. In the past <b>5 years</b> was she/he* sexually active, even once?                                                                                                                                                                                                     | No | If yes, complete the following questions (19a. to 19g.)<br><br><b>For the following set of questions, think about the past 5 years:</b><br>19a. Did she/he* have sex in exchange for money or drugs?<br>-----                                                               |

Date Generated: 04/28/2020 10:47 EDT

CL6.0A DRAI – Donor > 12 years old  
01-01-2015

Page 5 of 12

Version #: 2020.1.0.1032

Report Page:  
Staff Completing:

Page 7 of 56

68



Patient Name: Releaseone Organ  
ABO: -----

UNOS #: -----  
OPO #: -----

MRN: 654321

## CL6.0A DRAI – DONOR > 12 YEARS OLD 01-01-2015 - #1

19a(i). *If yes,*  
When?

-----

*Was the donor Male or Female?*

-----

19b. **MALE DONOR only:** Did he have sex with another male?

-----

19b(i). *If yes,*  
When?

-----

19d. **FEMALE DONOR only:** Did she have sex with a male who had sex with another male?

-----

19d(i). *If yes,*  
When?

-----

19c. Did she/he\* have sex with a person who has had sex in exchange for money or drugs?

-----

19c(i). *If yes,*  
When?

-----

19e. Did she/he\* have sex with a person who used a needle to inject drugs that were not prescribed by their own doctor?

-----

19e(i). *If yes,*  
When?

-----

19f. Did she/he\* have sex with a person who has received medication for a bleeding disorder such as hemophilia?

-----

*If yes,*

19f(i). Do you know the name of the medication?

-----

19f(i)a. *If yes,*  
What was it?

-----

19f(ii). Was the medication human derived?

-----

19f(iii). When was it used?

-----

19g. Did she/he\* have sex with a person who had a positive test for, or was suspected of having, Hepatitis B, Hepatitis C, or HIV?

-----

*If yes,*

19g(i). Which virus and when?

-----

19g(ii). Was that person sick from the virus during that time, such as having abdominal pain, joint pain, exhaustion, fever, nausea, vomiting, diarrhea, or yellowing of the eyes or skin?

-----

Patient Name: Releaseone Organ  
ABO: -----

UNOS #: -----  
OPO #: -----

MRN: 654321

## CL6.0A DRAI – DONOR > 12 YEARS OLD 01-01-2015 - #1

|                                                                                                                                                                                      |       |                                                                                                                                                                                                                   |
|--------------------------------------------------------------------------------------------------------------------------------------------------------------------------------------|-------|-------------------------------------------------------------------------------------------------------------------------------------------------------------------------------------------------------------------|
| 20. In the past <b>5 years</b> , did she/he* receive medication for a bleeding disorder such as hemophilia?                                                                          | No    | 20a. When?<br>-----<br>20b. What was the reason?<br>-----<br>20c. Do you know the name of the medication?<br>-----<br>20c(i). If yes,<br>What was it?<br>-----<br>20d. Was the medication human derived?<br>----- |
| 21. Did she/he* <b>EVER</b> use or take drugs, such as steroids, cocaine, heroin, amphetamines, or anything <b>NOT</b> prescribed by her/his* doctor?                                | No    | 21a. What was it?<br>-----<br>21b. How often and how long was it used?<br>-----<br>21c. When was it last used?<br>-----<br>21d. Were needles used?<br>-----<br>21d(i). If no,<br>How was it taken?<br>-----       |
| 22a. Did she/he* <b>EVER</b> have a transplant or medical procedure that involved being exposed to <u>live</u> cells, tissues or organs from an animal?                              | ----- | 22a(i). Explain:<br>-----                                                                                                                                                                                         |
| 22b. Did she/he* live with, or have sex with, a person who had?                                                                                                                      | ----- | 22b(i). Explain:<br>-----                                                                                                                                                                                         |
| 23. Was she/he* <b>EVER</b> told by a physician that she/he* had a disease of the brain or a neurological disease such as Alzheimer's, Parkinson's, multiple sclerosis, or epilepsy? | No    | 23a. What was she/he* told by a physician?<br>-----                                                                                                                                                               |
| 24. Was she/he* <b>EVER</b> refused as a blood donor or told not to donate?                                                                                                          | No    | 24a. What was the reason?<br>-----                                                                                                                                                                                |
| 25. Did she/he* <b>EVER</b> have any kind of surgery?                                                                                                                                | Yes   | 25a. What kind?<br>Tonsillectomy<br>25b. Where?<br>Akron<br>25c. When?<br>1991                                                                                                                                    |
|                                                                                                                                                                                      |       |                                                                                                                                                                                                                   |

Date Generated: 04/28/2020 10:47 EDT CL6.0A DRAI – Donor > 12 years old Page 7 of 12

01-01-2015

Version #: 2020.1.0.1032

Report Page:

Page 9 of 56

Staff Completing:

70

Patient Name: Releaseone Organ  
ABO: -----

UNOS #: -----  
OPO #: -----

MRN: 654321

## CL6.0A DRAI – DONOR > 12 YEARS OLD 01-01-2015 - #1

|                                                                                                             |     |                                                                                                                                                                                                                                                                                                                                                                                                                                                                                     |
|-------------------------------------------------------------------------------------------------------------|-----|-------------------------------------------------------------------------------------------------------------------------------------------------------------------------------------------------------------------------------------------------------------------------------------------------------------------------------------------------------------------------------------------------------------------------------------------------------------------------------------|
| 26. Did she/he* <b>EVER</b> travel or live outside of the United States or Canada?                          | Yes | 26a. Where?<br>Mexico<br>26b. When and for how long?<br>5 years ago; 1 week<br>26c. Did she/he* <b>EVER</b> receive a blood transfusion or other medical treatment outside of the United States or Canada?<br>No<br>If yes,<br>26c(i). What occurred (which one)?<br>-----<br>26c(ii). Describe where and when:<br>-----<br>If international travel or residency is extensive, be aware of query regarding vaccinations or other shots (within the past 12 months) at question #12. |
| 27. Was she/he* <b>EVER</b> a U.S. military member, a civilian military employee, or a dependent of either? | No  | 27a. Did she/he* ever live or work on a U.S. military base outside the United States?<br>-----<br>If yes,<br>27a(i). In which country or countries?<br>-----<br>27a(ii). When?<br>-----<br>Did this occur between 1980 and 1996 in Europe?<br>-----<br>27a(ii)a. If yes:<br>How long? (estimate total time)<br>-----<br>If in the military in the past 12 months, be aware of query regarding vaccinations or other shots at question #12.                                          |
| 28. Did she/he* <b>EVER</b> use or take growth hormone?                                                     | No  | 28a. When was it used?<br>-----<br>28b. What kind was it?<br>-----                                                                                                                                                                                                                                                                                                                                                                                                                  |
| 29. Did she/he* <b>EVER</b> have a positive or reactive test for:                                           |     |                                                                                                                                                                                                                                                                                                                                                                                                                                                                                     |
| 29a. the HIV/AIDS virus?                                                                                    | No  | 29a(i). Explain:<br>-----                                                                                                                                                                                                                                                                                                                                                                                                                                                           |
| 29b. hepatitis?                                                                                             | No  | 29b(i). Explain:<br>-----                                                                                                                                                                                                                                                                                                                                                                                                                                                           |
| 29c. HTLV-I or HTLV-II?                                                                                     | No  | 29c(i). Explain:<br>-----                                                                                                                                                                                                                                                                                                                                                                                                                                                           |
| 29d. <i>T. cruzi</i> or told she/he* has Chagas' disease?                                                   | No  | 29d(i). Explain:<br>-----                                                                                                                                                                                                                                                                                                                                                                                                                                                           |
| 30. Did she/he* <b>EVER</b> have liver disease or hepatitis?                                                | No  | 30a. What kind?<br>-----<br>30b. When?<br>-----                                                                                                                                                                                                                                                                                                                                                                                                                                     |

Date Generated: 04/28/2020 10:47 EDT

CL6.0A DRAI – Donor > 12 years old Page 8 of 12  
01-01-2015

Version #: 2020.1.0.1032

Report Page: Page 10 of 56  
Staff Completing:

71

Patient Name: Releaseone Organ  
ABO: -----

UNOS #: -----  
OPO #: -----

MRN: 654321

## CL6.0A DRAI – DONOR > 12 YEARS OLD 01-01-2015 - #1

|                                                                                                    |    |                                                                                                                                                                                                                                                                                                                                                          |
|----------------------------------------------------------------------------------------------------|----|----------------------------------------------------------------------------------------------------------------------------------------------------------------------------------------------------------------------------------------------------------------------------------------------------------------------------------------------------------|
| 31. Did she/he* <b>EVER</b> have malaria?                                                          | No | 31a. When?<br>-----<br>31b. Where was she/he* treated?<br>-----                                                                                                                                                                                                                                                                                          |
| 32. Did she/he* <b>EVER</b> have cancer?                                                           | No | 32a. What type?<br>-----<br><i>Was skin cancer named?</i><br>-----<br>32a(i). <i>If skin cancer:</i><br>What kind?<br>-----<br>32b. When was it diagnosed?<br>-----<br>32c. Describe when and where surgery, radiation, or chemotherapy occurred:<br>-----<br>32d. Was the cancer considered cured?<br>-----<br>32d(i). <i>If yes,</i><br>When?<br>----- |
| 33. Did she/he* <b>EVER</b> smoke?                                                                 | No | 33a. What was it?<br>-----<br><i>Was cigarettes named?</i><br>-----<br>33a(i). <i>If cigarettes:</i><br>How many packs per day?<br>-----<br>33b. How many years?<br>-----<br>33c. Did she/he* quit?<br>-----<br>33c(i). <i>If yes,</i><br>When?<br>-----                                                                                                 |
| 34a. Did she/he* <b>EVER</b> have lung disease such as asthma, COPD, or emphysema?                 | No | 34a(i). Explain:<br>-----                                                                                                                                                                                                                                                                                                                                |
| 34b. Did she/he* <b>EVER</b> have tuberculosis, or a positive skin or blood test for tuberculosis? | No | 34b(i). Did she/he* receive treatment?<br>-----<br><i>If yes,</i><br>34b(i)a. When?<br>-----<br>34b(i)b. How long?<br>-----                                                                                                                                                                                                                              |
|                                                                                                    |    |                                                                                                                                                                                                                                                                                                                                                          |

Date Generated: 04/28/2020 10:47 EDT

CL6.0A DRAI – Donor > 12 years old  
01-01-2015

Page 9 of 12

Version #: 2020.1.0.1032

Report Page:  
Staff Completing:

Page 11 of 56

72

Patient Name: Releaseone Organ  
ABO: -----

UNOS #: -----  
OPO #: -----

MRN: 654321

## CL6.0A DRAI – DONOR > 12 YEARS OLD 01-01-2015 - #1

|                                                                                                                                                                  |    |                                                                                                                       |
|------------------------------------------------------------------------------------------------------------------------------------------------------------------|----|-----------------------------------------------------------------------------------------------------------------------|
| 35. Did she/he* <b>EVER</b> drink alcohol?                                                                                                                       | No | 35a. What type?<br>-----<br>35b. How often?<br>-----<br>35c. How much?<br>-----<br>35d. How long?<br>-----            |
| 36. Did she/he* <b>EVER</b> have diabetes?                                                                                                                       | No | 36a. For how many years?<br>-----<br>36b. Was it treated?<br>-----<br>36b(i). If yes,<br>How?<br>-----                |
| 37a. Did she/he* <b>EVER</b> have kidney disease, kidney stones, or frequent kidney infections?                                                                  | No | 37a(i). What did she/he* have?<br>-----<br>37a(ii). When?<br>-----                                                    |
| 37b. Was she/he* <b>EVER</b> treated with dialysis?                                                                                                              | No | 37b(i). Was it peritoneal dialysis or hemodialysis?<br>-----<br>37b(ii). When?<br>-----                               |
| 38. Did she/he* <b>EVER</b> have high blood pressure or high cholesterol?                                                                                        | No | 38a. Which one (or both)?<br>-----<br>38b. For how many years?<br>-----                                               |
| 39. Did she/he* <b>EVER</b> have a heart attack or heart disease, such as a weak heart, a heart valve problem or an infection involving the heart?               | No | 39a. Explain:<br>-----<br>39b. How was it treated?<br>-----                                                           |
| 40. Did she/he* <b>EVER</b> have circulation problems of the legs, such as varicose veins, blood clots, leg ulcers, or skin discoloration of the feet or ankles? | No | 40a. Explain:<br>-----                                                                                                |
| 41. Did she/he* <b>EVER</b> have an autoimmune disease such as systemic lupus erythematosus, rheumatoid arthritis, sarcoidosis, etc.?                            | No | 41a. What was it?<br>-----<br>41b. Did she/he* take steroids?<br>-----<br><i>If yes, complete 5a(ii) and 5a(iii).</i> |
|                                                                                                                                                                  |    |                                                                                                                       |

Date Generated: 04/28/2020 10:47 EDT CL6.0A DRAI – Donor > 12 years old Page 10 of 12

01-01-2015

Version #: 2020.1.0.1032

Report Page:

Page 12 of 56

Staff Completing:

73

Patient Name: Releaseone Organ  
ABO: -----

UNOS #: -----  
OPO #: -----

MRN: 654321

## CL6.0A DRAI – DONOR > 12 YEARS OLD 01-01-2015 - #1

|                                                                                                                                                                                                                           |    |                                                                                                                                                                                                                                                                                                                                                                                                                                            |
|---------------------------------------------------------------------------------------------------------------------------------------------------------------------------------------------------------------------------|----|--------------------------------------------------------------------------------------------------------------------------------------------------------------------------------------------------------------------------------------------------------------------------------------------------------------------------------------------------------------------------------------------------------------------------------------------|
| 42. Did she/he* <b>EVER</b> have any eye problems, procedures, or surgery?                                                                                                                                                | No | 42a. <i>If yes to eye problems:</i><br>What kind of eye problems?<br>-----<br>42b. <i>If yes to eye surgery or procedures:</i><br>What kind of surgery or procedure was performed and why?<br>-----<br>42c. Which eye(s)?<br>-----<br>42d. What is the name and/or phone number of her/his* eye doctor or eye clinic?<br>-----                                                                                                             |
| 43. Did she/he* or <b>any</b> of her/his* relatives have Creutzfeldt-Jakob disease, which is also called CJD or variant CJD?                                                                                              | No | 43a. Who did?<br>-----<br>43a(i). <i>If a relative,</i><br>Is this person a blood relative? ( <i>Note: The definition of blood relative is a person who is related through a common ancestor and not by marriage or adoption</i> )<br>-----<br>43a(i)a. <i>If yes,</i><br>Which blood relative?<br>-----<br>43b. Is there a physician, relative, or other person who can provide more information? ( <i>document discussion</i> )<br>----- |
| 44a. Did her/his* family have a history of diabetes?                                                                                                                                                                      | No | 44a(i). Describe type of relative, such as mother, father, sister, brother, etc.:<br>-----                                                                                                                                                                                                                                                                                                                                                 |
| 44b. Did her/his* family have a history of coronary artery disease, which is a buildup of plaque in the heart's arteries?                                                                                                 | No | 44b(i). Describe type of relative, such as mother, father, sister, brother, etc.:<br>-----                                                                                                                                                                                                                                                                                                                                                 |
| <i>Final Questions</i>                                                                                                                                                                                                    |    |                                                                                                                                                                                                                                                                                                                                                                                                                                            |
| 45. Are there other medical conditions you are aware of that we have not discussed?                                                                                                                                       | No | 45a. Describe:<br>-----                                                                                                                                                                                                                                                                                                                                                                                                                    |
| 46. Do you now have any concerns that her/his* donation should not proceed?                                                                                                                                               | No | 46a. Can you share your concerns?<br>-----                                                                                                                                                                                                                                                                                                                                                                                                 |
| 47. Regarding these questions, are there other people, including healthcare professionals, who may provide additional information?                                                                                        | No | 47a. Name(s) and contact information:<br>-----                                                                                                                                                                                                                                                                                                                                                                                             |
| 48. Do you have any questions about these questions?                                                                                                                                                                      | No | 48a. Document:<br>-----                                                                                                                                                                                                                                                                                                                                                                                                                    |
| <i>Note to interviewer: Question 49, the HIV-1 Group O Risk Question, must be asked if the test kit being used for HIV-1 <b>Ab</b> testing is not labeled to include HIV-1 Group O.</i><br><i>Question 49 NOT skipped</i> |    |                                                                                                                                                                                                                                                                                                                                                                                                                                            |
| 49. Did she/he* <b>EVER</b> have sex with a person who was born in or lived in any country in Africa?                                                                                                                     | No | 49a. When was the person born, or when did the person live, in Africa?<br>-----<br><i>Was this since 1977?</i><br>-----<br>49a(i). <i>If since 1977:</i><br>What country were they from?<br>-----                                                                                                                                                                                                                                          |

Date Generated: 04/28/2020 10:47 EDT

CL6.0A DRAI – Donor > 12 years old Page 11 of 12

01-01-2015

Version #: 2020.1.0.1032

Report Page:

Page 13 of 56

Staff Completing:

74

Patient Name: Releaseone Organ UNOS #: -----  
ABO: ----- OPO #:  
MRN: 654321

CL6.0A DRAI – DONOR > 12 YEARS OLD 01-01-2015 - #1

ADDITIONAL NOTES

-----

ELECTRONIC SIGNATURE

Person completing this form acknowledges all questions have been answered truthfully and to the best of their knowledge.

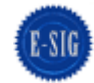

Electronically Signed By: Redacted

On: 04/13/2020 18:14 EDT

Patient Name:Releaseone Organ

ABO:-----

UNOS #:-----

OPO #:-----

MRN:654321

FINAL ORGAN DISPOSITION

Organ Outcome:-----

Final Organ Disposition Date:--/--/---- --:--

Are there any critical deviances associated with this referral?--

if Yes:-----

Are Any of These Reasons Why the Patient Did Not Become a Donor?

Not Formally Declared Brain Dead:-----

DCD Potential:-----

Medically Unsuitable:-----

Family Declined:--

ME/Coroner Declined:--

Cardiac Arrested:--

Did this patient have donation potential?--

Reason:-----

Referral Classification:-----

Eligible/Imminent Exclusions

• -----

Kidney

• -----

Heart

• -----

Liver

• -----

Lung

• -----

Comments:

-----



Patient Name: Releaseone Organ UNOS #: -----  
ABO: ----- OPO #: -----  
MRN: 654321

DONOR INFORMATION

Referral Type: O

Tissue ID: ----- UNOS Donor ID: ----- MRN: 654321

Additional ID: -----

Crossclamp Date-Time: --/--/---- --:--

Referring Hospital: 

Redacted Redacted

Redacted Redacted

Redacted Redacted

Redacted

Unit: 

Redacted

 Unit Detail: -----

Telephone #: 

Redacted

 Fax #: -----

Transferred Reason: ----- Transferred Date-Time: --/--/---- --:--

Transfer Company: ----- (Filtered by: -----)

Current Donor Location: 

Redacted Redacted

Redacted Redacted

Redacted Redacted

Redacted

Unit: 

Redacted

 Unit Detail: -----

Telephone #: 

Redacted

 Fax #: -----

Admission Date-Time: 04/05/2020 14:00 EDT Referral Date-Time: 04/06/2020 10:43 EDT

Referring Person: 

Redacted

 Referring Person's Title: PTC

Arrival Date-Time: --/--/---- --:-- Attending Physician: -----

Last Name: Organ First: Releaseone Middle: --

SSN: 789-45-6123

Address: -----

DOB: 02/20/1980 Age: 40 Years Gender: Male

Height: ----- Weight: ----- BMI: --

Race: White: Not Specified/Unknown

Additional Race(s): -----

Citizenship: --

U.S. Born: -- How Long lived in U.S.: -- years Active Military: --

Occupation: -----

Comments: -----

HLA Lab: -----

A: -- -- B: -- -- BW4: -- -- BW6: -- -- C: -- --

DR: -- -- DR51: -- -- DR52: -- --

DR53: -- --

DQB1: -- -- DQA1: ----- DPB1: -----

Is there time for a preliminary crossmatch? --

ABO: ----- RH: -----

ABO Verification Sources: -----

Brain Death Declaration: Was the patient declared legally brain dead: --

BD1 Date-Time: --/--/---- --:-- Name: -----

BD2 Date-Time: --/--/---- --:-- Name: -----

Date Generated: 04/28/2020 10:47 EDT Donor Information Page 1 of 2

Version #: 2020.1.0.1032 Report Page: Page 16 of 56

Staff Completing:

Patient Name: Releaseone Organ

ABO: -----

UNOS #: -----

OPO #: -----

MRN: 654321

DONOR INFORMATION

Methods Used: -----

If Other, Specify: -----

Cardiac arrest since neurological event that led to declaration of brain death? --

Asystole Date-Time: --/--/---- --:--

M.E./Coroner Case: --Case #: -----Contact Phone: -----

M.E./Coroner/Hospital Name: -----Contacted Date-Time: --/--/---- --:--

Autopsy: -----By whom: -----

Permission for Donation: --

Restrictions / Denial reason(s): -----

M.E./Other Special Requests: -----

UNOS Cause of Death: AnoxiaIf Other, Specify: -----

Mechanism of Death: -----Circumstances of Death: -----

Does donor meet DCD criteria? --Does donor meet ECD criteria? --Match KDPI: -- %Terminal KDPI: -- %

Does donor meet double kidney allocation criteria? --

Use double kidney allocation instead of expanded donor allocation? --

Abdominal Allocation Start: --/--/---- --:--Abdominal Allocation Finish: --/--/---- --:--

Thoracic Allocation Start: --/--/---- --:--Thoracic Allocation Finish: --/--/---- --:--

Planned OR Date-Time: --/--/---- --:--Date-Time Reason: -----

Last Updated By: Redacted on 04/13/2020 17:49

Previous Planned OR Date-Time: 04/06/2020 21:00 EDTOR Date-Time Reason: -----

Trx Ctr Comments: -----

Patient Name: Releaseone Organ  
ABO: -----  
UNOS #: -----  
OPO #: -----  
MRN: 654321

AUTHORIZATION INFORMATION

Did the patient express to family or others the intent to be a donor? -----

Authorization by Donor Designation: -----

Formal Request By: ----- Date-Time: --/--/---- :--

Religion: -----

Authorized PartyFirst Name: ----- Last Name: -----

Relationship: ----- Phone: -----

Address: -----

Funeral Home: ----- Telephone #: -----

Name of Contact: ----- Date-Time: --/--/---- :--

Restrictions/Comments: -----

Funeral Home Special Instructions: -----

ORGAN AUTHORIZATION

| Organ        | Authorization Requested | If not, reason | Authorization Obtained | If not, reason |
|--------------|-------------------------|----------------|------------------------|----------------|
| Right Kidney | --                      |                | ----                   |                |
| Left Kidney  | --                      |                | ----                   |                |
| Liver        | --                      |                | ----                   |                |
| Intestine    | --                      |                | ----                   |                |
| Pancreas     | --                      |                | ----                   |                |
| Heart        | --                      |                | ----                   |                |
| Right Lung   | --                      |                | ----                   |                |
| Left Lung    | --                      |                | ----                   |                |
| Other:       | --                      |                | ----                   |                |
| Other 2:     | --                      |                | ----                   |                |
| Other 3:     | --                      |                | ----                   |                |
| Other 4:     | --                      |                | ----                   |                |
| Other 5:     | --                      |                | ----                   |                |

RESEARCH & EDUCATION AUTHORIZATION FOR TISSUES AND ORGANS

| Type      | Authorization Requested | If not, reason | Authorization Obtained | If not, reason |
|-----------|-------------------------|----------------|------------------------|----------------|
| Research  | --                      |                | ----                   |                |
| Education | --                      |                | ----                   |                |

TISSUE AUTHORIZATION

| Tissue                                        | Authorization Requested | If not, reason | Authorization Obtained | If not, reason |
|-----------------------------------------------|-------------------------|----------------|------------------------|----------------|
| Eyes - includes corneas and/or whole globes   | -----                   |                | ----                   |                |
| Heart for valves, blood vessels & pericardium | -----                   |                | ----                   |                |
| Sternum with costal cartilage/ribs            | -----                   |                | ----                   |                |
| Veins & arteries                              | -----                   |                | ----                   |                |

Patient Name:Releaseone Organ

ABO:-----

UNOS #:-----

OPO #:-----

MRN:654321

AUTHORIZATION INFORMATION

|                                                                                                                                                                           |       |  |       |  |
|---------------------------------------------------------------------------------------------------------------------------------------------------------------------------|-------|--|-------|--|
| Bones of the lower limbs, including hemipelvis, iliac crest, femur, tibia/fibula, talus, calcaneous and connective tissue including tendons, ligaments, nerves and fascia | ----- |  | ----- |  |
| Skin - split and full thickness grafts                                                                                                                                    | ----- |  | ----- |  |
| Humerus, including the bone of the upper limb and connective tissue including tendons, ligaments, nerves and fascia                                                       | ----- |  | ----- |  |
| Radius/ulna, including bones of the upper limbs and connective tissue including tendons, ligaments, nerves and fascia                                                     | ----- |  | ----- |  |
| Other:                                                                                                                                                                    | ----- |  | ----- |  |
| Other 2:                                                                                                                                                                  | ----- |  | ----- |  |
| Other 3:                                                                                                                                                                  | ----- |  | ----- |  |
| Other 4:                                                                                                                                                                  | ----- |  | ----- |  |

Patient Name:Releaseone Organ

ABO:-----

UNOS #:-----

OPO #:-----

MRN:654321

# ADMISSION COURSE

Course of Events:  
-----

Radiological Studies Performed:-----

OR Procedures:-----

Defibrillation:--

CPR Administered:--

Cardiac Arrest/Downtime:--

Patient Name: Releaseone Organ

ABO: -----

UNOS #: -----

OPO #: -----

MRN: 654321

ORGAN PHYSICAL ASSESSMENT

Body Identified By

Patient's Nurse: ☐

Toe Tag: ☐

Wrist Band: ☐

Other: ☐

Person Identifying: -----

Examination Performed By: -----Date-Time: --/--/---- --:--

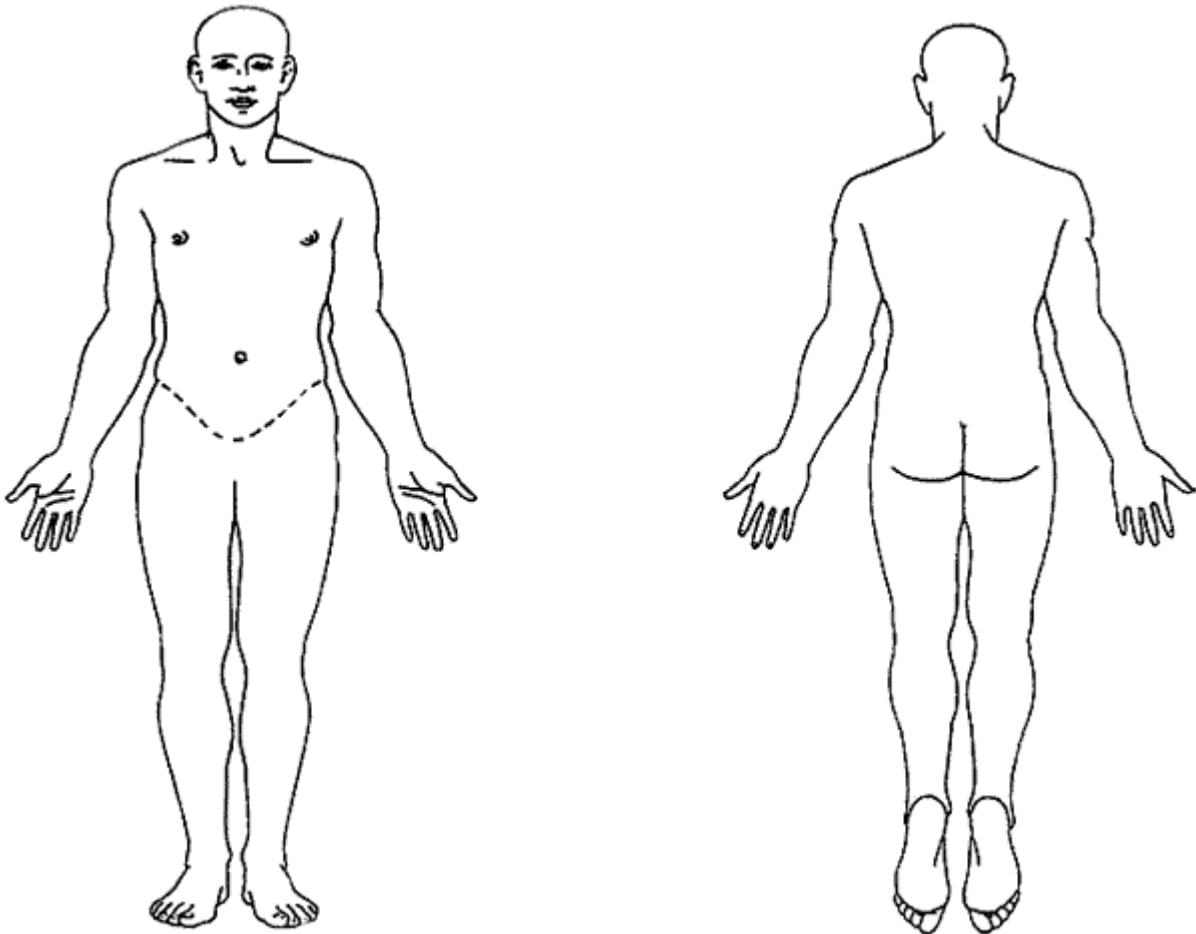

ASSESSMENT KEY

|                       |                               |                            |                                     |
|-----------------------|-------------------------------|----------------------------|-------------------------------------|
| 1. ETT                | 8. PA Cath Line               | 15. Temperature Probe      | 22. Dressing/Bandage                |
| 2. Trach              | 9. Track Marks                | 16. Surgical Scar/Incision | 23. Cast/Ortho Device               |
| 3. Chest Tube         | 10. Other IV Site             | 17. Other Scars            | 24. Body Piercing                   |
| 4. NG/OG/Feeding Tube | 11. Drains                    | 18. Laceration/Wound       | 25. Tattoo                          |
| 5. Foley              | 12. Peripheral IV             | 19. Abrasion               | 26. Skin Lesion/Rash/Genital Lesion |
| 6. Arterial Line      | 13. Needle Site: Hospital     | 20. Bruise/Contusion       | 27. Other                           |
| 7. Central Line       | 14. Needle Site: Non-Hospital | 21. Fracture/Dislocation   | 28. Unremarkable                    |

ASSESSMENT KEY

1. ETT: ☐

2. Trach: ☐

3. Chest Tube: ☐

4. NG/OG/Feeding Tube: -----

Date Generated: 04/28/2020 10:47 EDT

Version #: 2020.1.0.1032

Physical Assessment Report Page: Staff Completing:

Page 1 of 2  
Page 21 of 56

Patient Name:Releaseone Organ

ABO:-----

UNOS #:-----

OPO #:-----

MRN:654321

ORGAN PHYSICAL ASSESSMENT

|                               |                          |                                          |                          |
|-------------------------------|--------------------------|------------------------------------------|--------------------------|
| 5. Foley                      |                          | 16. Surgical Scar/Incision               |                          |
| 6. Arterial Line:             | <input type="checkbox"/> | 17. Other Scars:                         | -----                    |
| 7. Central Line:              | <input type="checkbox"/> | 18. Laceration/Wound:                    | -----                    |
| 8. PA Cath Line:              | <input type="checkbox"/> | 19. Abrasion:                            | -----                    |
| 9. Track Marks:               | <input type="checkbox"/> | 20. Bruise/Contusion:                    | -----                    |
| 10. Other IV Site:            | -----                    | 21. Fracture/Dislocation:                | -----                    |
| 11. Drains:                   | -----                    | 22. Dressing/Bandage:                    | -----                    |
| 12. Peripheral IV             |                          | 23. Cast/Ortho Device:                   | -----                    |
| 13. Needle Site: Hospital     |                          | 24. Body Piercing:                       | -----                    |
| 14. Needle Site: Non-Hospital |                          | 25. Tattoo:                              | -----                    |
| 15. Temperature Probe         |                          | 26. Skin Lesion/Rash/<br>Genital Lesion: | -----                    |
|                               |                          | 27. Other:                               | -----                    |
|                               |                          | 28. Unremarkable:                        | <input type="checkbox"/> |

Comments:  
-----

Patient Name: Releaseone Organ  
ABO: -----  
UNOS #: -----  
OPO #: -----  
MRN: 654321

ORGAN PHYSICAL EXAMINATION

|              |                                   |    |                                 |                          |
|--------------|-----------------------------------|----|---------------------------------|--------------------------|
| Evidence of: | Trauma to tissue retrieval sites: | -- | Jaundice:                       | --                       |
|              | Non-medical injection of drugs:   | -- | Enlarged lymph nodes:           | --                       |
|              | Infection:                        | -- | Anal tears/perianal warts:      | --                       |
|              | Genital lesions:                  | -- | White spots in mouth:           | --                       |
|              | Blue/purple spots:                | -- | Unable to Visualize Oral Cavity | <input type="checkbox"/> |
|              |                                   |    | (see comments)                  |                          |

PULMONARY

|                |                 |                          |
|----------------|-----------------|--------------------------|
| Tubes:         | Cricothyrotomy: | <input type="checkbox"/> |
| Decompression: | Left Chest:     | <input type="checkbox"/> |
|                | Right Chest:    | <input type="checkbox"/> |
| Breath Sounds: | -----           |                          |
|                | Wheezes:        | <input type="checkbox"/> |
|                | Clear:          | <input type="checkbox"/> |
|                | Rales:          | <input type="checkbox"/> |
|                | Rhonchi:        | <input type="checkbox"/> |
|                | Absent:         | <input type="checkbox"/> |
|                | Decreased:      | <input type="checkbox"/> |

CARDIOVASCULAR

|                      |                          |                          |
|----------------------|--------------------------|--------------------------|
| Lines:               | Other:                   | <input type="checkbox"/> |
| Heart Rhythm:        | -----                    |                          |
| Heart Tones:         | -----                    |                          |
| Periph. Pulses:      | -----                    |                          |
| Periph. Edema:       | -----                    |                          |
| Thoracic Evaluation: | Unremarkable:            | <input type="checkbox"/> |
|                      | Chest trauma:            | <input type="checkbox"/> |
|                      | Intracardiac injections: | <input type="checkbox"/> |
|                      | Other:                   | <input type="checkbox"/> |

INTEGUMENTARY

|              |    |             |
|--------------|----|-------------|
| Color:       | -- |             |
| Temperature: | -- | Temp: -- -- |

GASTROINTESTINAL

|                    |                 |                          |
|--------------------|-----------------|--------------------------|
| DPL:               | --              |                          |
| Abdomen:           | Incisions:      | <input type="checkbox"/> |
|                    | Surgical scars: | <input type="checkbox"/> |
|                    | Other scars:    | <input type="checkbox"/> |
| Abdomen Texture:   | --              |                          |
| Bowel Sounds:      | --              |                          |
| Abdomen Distended: | -----           |                          |

GENITOURINARY

|               |       |                   |       |
|---------------|-------|-------------------|-------|
| Urine Volume: | ----- | Urine Appearance: | ----- |
|---------------|-------|-------------------|-------|

MUSCULOSKELETAL

|            |       |
|------------|-------|
| Fractures: | ----- |
|------------|-------|

COMMENTS

Comments  
-----



Patient Name: Releaseone Organ

ABO: -----

UNOS #: -----

OPO #: -----

MRN: 654321

LAB PROFILE - CHEMISTRY

|                        |            |
|------------------------|------------|
| Date                   | --/--/---- |
| Time                   | --:--      |
| OPO/Hospital           | -----      |
| Na+ (140-160)          | -----      |
| K+ (3.5-5.5)           | -----      |
| Cl- (96-115)           | -----      |
| CO <sub>2</sub>        | -----      |
| BUN (<20)              | -----      |
| Creatinine (<1.5)      | -----      |
| Creatinine Clearance   | -----      |
| Glucose (65-150)       | -----      |
| Calcium (8.5-10.5)     | -----      |
| Ionized Calcium        | -----      |
| Mg                     | -----      |
| Phosphorus             | -----      |
| Lactate                | -----      |
| Total Bili             | -----      |
| Direct/Conjugated Bili | -----      |
| Indirect/Unconj. Bili  | -----      |
| SGOT (AST) (0-40)      | -----      |
| SGPT (ALT) (5-35)      | -----      |
| Alk Phos               | -----      |
| GGT (17-55)            | -----      |
| Albumin                | -----      |
| Total Protein          | -----      |
| LDH                    | -----      |
| PT (11-15)             | -----      |
| INR                    | -----      |
| PTT (24-36)            | -----      |
| CK/MB                  | -----      |
| CPK                    | -----      |
| CPK Index (<2.5%)      | -----      |
| Total MB               | -----      |
| Troponin-I             | -----      |
| Troponin-T             | -----      |
| Amylase                | -----      |
| Lipase (0-80)          | -----      |
| Lipase ULN             | -----      |
| Hgb A1C (2%-15%)       | -----      |
| BNP                    | -----      |
| Serum Osmo             | -----      |
| Serum Beta HCG         | -----      |
| Fibrinogen             | -----      |
| -----                  | -----      |
| -----                  | -----      |
| -----                  | -----      |

Patient Name:Releaseone Organ

ABO:-----

UNOS #:-----

OPO #:-----

MRN:654321

LAB PROFILE - CHEMISTRY

|       |       |
|-------|-------|
| ----- | ----- |
| ----- | ----- |

Comments:

-----

Patient Name:Releaseone Organ

ABO:-----

UNOS #:-----

OPO #:-----

MRN:654321

LAB PROFILE - CBC

|              |                  |
|--------------|------------------|
| Date-Time    | --/--/---- --:-- |
| OPO/Hospital | -----            |
| WBC          | -----            |
| RBC          | -----            |
| Hgb          | -----            |
| Hct          | -----            |
| Platelets    | -----            |
| Segs         | -----            |
| Lymphs       | -----            |
| Bands        | -----            |
| Mono         | -----            |
| Eos          | -----            |
| -----        | -----            |
| -----        | -----            |

Comments:  
-----

Patient Name:Releaseone Organ

ABO:-----

UNOS #:-----

OPO #:-----

MRN:654321

LAB PROFILE - TOXICOLOGY

Serum Alcohol:-----

Urine Toxicology:-----

Comments:-----

Patient Name:Releaseone Organ

ABO:-----

UNOS #:-----

OPO #:-----

MRN:654321

CULTURE RESULTS

☐ Cultures Not Done

DDR CLINICAL INFECTIONS

Clinical Infection Confirmed by Culture:-----

CULTURE RESULTS

Source:

N/A

Date-Time:

--/--/---- --:--

24 hr Result:

-----

48 hr Result:

-----

Final Result:

-----

Sensitivities:

-----

DonorNet Result:

-----

Patient Name:Releaseone Organ

ABO:-----

UNOS #:-----

OPO #:-----

MRN:654321

CULTURE/SAFETY REPORT

| Organ/<br>Tissue | Date-Time<br>Received | Result Type,<br>Source | Date-Time<br>Reported | Staff<br>Reporting | Method, Ph#/<br>Fax#/ Email | Reported To -<br>Name, Title | TxC/OPO | Posi-<br>tive? | Change from<br>prior results? | Clinical<br>Reviewer |
|------------------|-----------------------|------------------------|-----------------------|--------------------|-----------------------------|------------------------------|---------|----------------|-------------------------------|----------------------|
| -----            | --/--/---- -:--       | -----<br>-----         | --/--/---- -:--       | -----              | -----:<br>-----             | -----,<br>-----              | -----   | -----<br>-     | -----                         | -----                |

Comments:  
-----

Patient Name:Releaseeone Organ

ABO:-----

UNOS #:-----

OPO #:-----

MRN:654321

HEMODYNAMICS/TEMPERATURE

|                     |                   |
|---------------------|-------------------|
| From: Date-Time     | --/--/---- --:--  |
| To: Date-Time       | --/--/---- --:--  |
| Average BP          | -- / --           |
| Heart Rate          | -- - --           |
| High BP             | -- / --           |
| Duration            | -- --             |
| Low BP              | -- / --           |
| Duration            | -- --             |
| Heart Rhythm        | -----             |
| Hourly Urine Output | -- - --           |
| CVP                 | -- - --           |
| PA                  | -- / - - - - / -- |
| PAWP                | --                |
| PAMP                | -- - --           |
| PCWP                | -- - --           |
| CO/CI               | -- / - - - - / -- |
| SVV                 | --                |
| SVI                 | --                |
| Temp                | -- - - °C         |
| Warming Device      | -----             |
| Cooling Device      | -----             |
| Drug                | -----             |
| Dosage              | -----             |
| Unit                | -----             |
| Drug                | -----             |
| Dosage              | -----             |
| Unit                | -----             |
| Drug                | -----             |
| Dosage              | -----             |
| Unit                | -----             |
| Drug                | -----             |
| Dosage              | -----             |
| Unit                | -----             |
| Drug                | -----             |
| Dosage              | -----             |
| Unit                | -----             |

Vital Signs Comments:  
-----

Patient Name: Releaseone Organ

ABO: -----

UNOS #: -----

OPO #: -----

MRN: 654321

FLOWSHEET

| Date-Time                     | 04/05/2020 15:00     | 04/06/2020 07:59     | 04/06/2020 08:00     | 04/06/2020 09:00     |
|-------------------------------|----------------------|----------------------|----------------------|----------------------|
| VITAL SIGNS                   |                      |                      |                      |                      |
| BP                            | --/--                | --/--                | --/--                | --/--                |
| MAP                           | -----                | -----                | -----                | -----                |
| HR                            | --                   | --                   | --                   | --                   |
| Temperature                   | -- °C                | -- °C                | -- °C                | -- °C                |
| Temperature Regulating Device | -----                | -----                | -----                | -----                |
| CVP                           | -----                | -----                | -----                | -----                |
| PA                            | --/--                | --/--                | --/--                | --/--                |
| PCWP                          | --                   | --                   | --                   | --                   |
| PAMP                          | --                   | --                   | --                   | --                   |
| CO/CI                         | --/--                | --/--                | --/--                | --/--                |
| SaO2%                         | -----                | -----                | -----                | -----                |
| SVR                           | --                   | --                   | --                   | --                   |
| PVR                           | --                   | --                   | --                   | --                   |
| SVRI                          | --                   | --                   | --                   | --                   |
| SVV                           | --                   | --                   | --                   | --                   |
| PPV                           | --                   | --                   | --                   | --                   |
| RVSWI                         | --                   | --                   | --                   | --                   |
| LVSWI                         | --                   | --                   | --                   | --                   |
| Glucose checks                | -----                | -----                | -----                | -----                |
| -----                         | -----                | -----                | -----                | -----                |
| -----                         | -----                | -----                | -----                | -----                |
| -----                         | -----                | -----                | -----                | -----                |
| -----                         | -----                | -----                | -----                | -----                |
| -----                         | -----                | -----                | -----                | -----                |
| VENT SETTINGS                 |                      |                      |                      |                      |
| Mode                          | -----                | -----                | -----                | -----                |
| Rate                          | -----                | -----                | -----                | -----                |
| FiO2                          | -----                | -----                | -----                | -----                |
| TV                            | -----                | -----                | -----                | -----                |
| Peep                          | -----                | -----                | -----                | -----                |
| PC                            | -----                | -----                | -----                | -----                |
| PIP                           | -----                | -----                | -----                | -----                |
| -----                         | -----                | -----                | -----                | -----                |
| -----                         | -----                | -----                | -----                | -----                |
| -----                         | -----                | -----                | -----                | -----                |
| INTAKE                        |                      |                      |                      |                      |
| Fluid / Additive              | Dosage/Vol(mls)/Unit | Dosage/Vol(mls)/Unit | Dosage/Vol(mls)/Unit | Dosage/Vol(mls)/Unit |
| NS/-----                      | --/--/-----          | --/--/-----          | --/100/ml/hr         | --/100/-----         |
| t/-----                       | --/--/-----          | --/--/-----          | --/--/-----          | --/--/-----          |
| -----/-----                   | --/--/-----          | --/--/-----          | --/--/-----          | --/--/-----          |
| -----/-----                   | --/--/-----          | --/--/-----          | --/--/-----          | --/--/-----          |
| -----/-----                   | --/--/-----          | --/--/-----          | --/--/-----          | --/--/-----          |
| -----/-----                   | --/--/-----          | --/--/-----          | --/--/-----          | --/--/-----          |
| -----/-----                   | --/--/-----          | --/--/-----          | --/--/-----          | --/--/-----          |
| -----/-----                   | --/--/-----          | --/--/-----          | --/--/-----          | --/--/-----          |
| -----/-----                   | --/--/-----          | --/--/-----          | --/--/-----          | --/--/-----          |
| -----/-----                   | --/--/-----          | --/--/-----          | --/--/-----          | --/--/-----          |
| Medications                   | Dosage/Vol(mls)/Unit | Dosage/Vol(mls)/Unit | Dosage/Vol(mls)/Unit | Dosage/Vol(mls)/Unit |
| -----                         | --/--/--             | --/--/--             | --/--/--             | --/--/--             |
| -----                         | --/--/--             | --/--/--             | --/--/--             | --/--/--             |
| -----                         | --/--/--             | --/--/--             | --/--/--             | --/--/--             |



Patient Name: Releaseone Organ

UNOS #: -----

ABO: -----

OPO #: -----

MRN: 654321

FLWSHEET

|                                                    |                                     |                          |                          |                          |
|----------------------------------------------------|-------------------------------------|--------------------------|--------------------------|--------------------------|
| -----                                              | --/--/--                            | --/--/--                 | --/--/--                 | --/--/--                 |
| -----                                              | --/--/--                            | --/--/--                 | --/--/--                 | --/--/--                 |
| Intake Total                                       | -----                               | -----                    | 100                      | 100                      |
| OUTPUT                                             | 04/05/2020 15:00                    | 04/06/2020 07:59         | 04/06/2020 08:00         | 04/06/2020 09:00         |
| Urine Output (ml/hr)                               | 100                                 | 2000                     | 0                        | 0                        |
| CHHV                                               | --                                  | --                       | 100                      | 150                      |
| -----                                              | --                                  | --                       | --                       | --                       |
| Output Total                                       | --                                  | 2000                     | 100                      | 150                      |
| Running Balance                                    | --                                  | -2000                    | -2000                    | -2050                    |
| Exclude Intake Total/Output Total /Running Balance | <input checked="" type="checkbox"/> | <input type="checkbox"/> | <input type="checkbox"/> | <input type="checkbox"/> |

Comments:  
-----

Patient Name:Releaseone Organ

ABO:-----

UNOS #:-----

OPO #:-----

MRN:654321

MEDICATIONS/OTHER DRUGS

| DONORNET INOTROPIC MEDICATIONS |                 |                      |       |       |          |
|--------------------------------|-----------------|----------------------|-------|-------|----------|
| Begin Date-Time                | End Date-Time   | Inotropic Medication | Value | Units | Duration |
| --/--/--- --:--                | --/--/--- --:-- | -----                | ----- | ----- | -----    |

| MEDICATIONS/OTHER DRUGS |                   |        |             |           |                |          |                   |
|-------------------------|-------------------|--------|-------------|-----------|----------------|----------|-------------------|
| Medication              | Date-Time Started | Dosage | Dosage Unit | Peak Dose | Peak Dose Unit | Duration | Date-Time Stopped |
| -----                   | --/--/--- --:--   | -----  | -----       | -----     | -----          | -----    | --/--/--- --:--   |

Comments:  
-----

Patient Name:Releaseone Organ

ABO:-----

UNOS #:-----

OPO #:-----

MRN:654321

FLUID BALANCE

| FLUID INTAKE                |                 |             |                    |                                   | FLUID/URINE OUTPUT                |                                  |                  |                                    |
|-----------------------------|-----------------|-------------|--------------------|-----------------------------------|-----------------------------------|----------------------------------|------------------|------------------------------------|
| <div>Start Date-Time</div>  | Crystalloid ml. | Colloid ml. | Blood Products ml. | <div>Total Fluid Intake ml.</div> | <div>Total Urine Output ml.</div> | <div>Output ml.</div>            | Total Output ml. | <div>Lowest Urine Output ml.</div> |
| <div>End Date-Time</div>    |                 |             |                    | <div>Hour Average</div>           | <div>Hour Average</div>           | <div>Non-Urine Output Type</div> |                  | <div>Hour Duration</div>           |
| <div>--/--/---- --:--</div> | --              | --          | --                 | <div>-----</div>                  | <div>--</div>                     | <div>--</div>                    | -----            | <div>--</div>                      |
| <div>--/--/---- --:--</div> |                 |             |                    | <div>-----</div>                  | <div>-----</div>                  | <div>-----</div>                 |                  | <div>--</div>                      |
| Intake Total                |                 |             |                    | <div>0 ml</div>                   | Output Total                      |                                  | 0 ml             |                                    |
|                             |                 |             |                    | 0 ml/hr                           |                                   |                                  |                  |                                    |
| COMMENTS                    |                 |             |                    |                                   |                                   |                                  |                  |                                    |

Patient Name:Releaseeone Organ

UNOS #:-----

ABO:-----

OPO #:

MRN:654321

BLOOD PRODUCT/COLLOID ADMINISTRATION SUMMARY

| Date-Time Completed | Blood/Colloid Type | Volume mL |
|---------------------|--------------------|-----------|
| --/--/---- --:--    | -----              | --        |

Comments:  
-----

Patient Name: Releaseone Organ UNOS #: -----  
ABO: ----- OPO #: -----  
MRN: 654321

TRANSFUSION/INFUSION - HEMODILUTION WORKSHEET

Date-Time sample drawn: --/--/---- --:--

| Transfusion of blood products within 48 hrs prior to specimen draw or asystole |            |        | Infusion of colloids within 48 hrs prior to specimen draw or asystole |              |        |
|--------------------------------------------------------------------------------|------------|--------|-----------------------------------------------------------------------|--------------|--------|
| Date-Time                                                                      | Blood Type | Volume | Date-Time                                                             | Colloid Type | Volume |
| --/--/---- --:--                                                               | -----      | --     | --/--/---- --:--                                                      | -----        | --     |

| Donor weight in kilograms: --       |  |            |                                    |  |            |
|-------------------------------------|--|------------|------------------------------------|--|------------|
| ESTIMATED TOTAL PLASMA VOLUME (TPV) |  |            | ESTIMATED TOTAL BLOOD VOLUME (TBV) |  |            |
| TPV = Donor Wt (kg)                 |  | -- / 0.025 | TBV = Donor Wt (kg)                |  | -- / 0.015 |
| TPV =                               |  | -- mls     | TBV =                              |  | -- mls     |

| A: TOTAL VOLUME OF BLOOD TRANSFUSED IN THE LAST 48 HOURS |         |
|----------------------------------------------------------|---------|
| RBC's (packed cells) =                                   | -- mls  |
| Whole Blood =                                            | -- mls  |
| Other Blood Products =                                   | -- mls  |
| Total of A =                                             | 0.0 mls |

| B: TOTAL VOLUME OF COLLOIDS INFUSED IN THE LAST 48 HOURS |         |
|----------------------------------------------------------|---------|
| FFP/Plasma =                                             | -- mls  |
| Platelets =                                              | -- mls  |
| Cryoprecipitate =                                        | -- mls  |
| Albumin 5% =                                             | -- mls  |
| Albumin 25% =                                            | -- mls  |
| Dextran =                                                | -- mls  |
| Other Colloids =                                         | -- mls  |
| Total of B =                                             | 0.0 mls |

| C: TOTAL VOLUME OF CRYSTALLOIDS INFUSED IN LAST HOUR |       |                  |     |
|------------------------------------------------------|-------|------------------|-----|
| Date-Time                                            | Type  | Volume           |     |
| --/--/---- --:--                                     | ----- | --               | mls |
|                                                      |       | Total of C = 0.0 | mls |

| D: DETERMINATION OF ELIGIBILITY                                                              |   |     |   |     |   |     |   |     |    |   |     |
|----------------------------------------------------------------------------------------------|---|-----|---|-----|---|-----|---|-----|----|---|-----|
| 1) Is B + C < TPV?                                                                           | ( | 0.0 | + | 0.0 | = | 0.0 | ) | <   | -- | ? | N/A |
| 2) Is A + B + C < TBV?                                                                       | ( | 0.0 | + | 0.0 | + | 0.0 | = | 0.0 | )  | < | --  |
| Weight and Date-Time Sample Drawn must have values to calculate Determination of Eligibility |   |     |   |     |   |     |   |     |    |   |     |

Comments:  
-----

Patient Name:Releaseeone Organ

ABO:-----

UNOS #:-----

OPO #:-----

MRN:654321

SEROLOGIES

Date-Time Drawn:--/--/---- --:--

Identifier:-----

Serology Lab:-----

Date-Time Results Obtained:--/--/---- --:--

Pre-transfusion or Post-transfusion: not selected

Qualified:--

Serology ABO:--

| For UNET*                           |                  | Result |
|-------------------------------------|------------------|--------|
| <input checked="" type="checkbox"/> | Anti-HBc:        | -----  |
| <input checked="" type="checkbox"/> | Anti-HCV:        | -----  |
| <input checked="" type="checkbox"/> | Anti-HIV I/II:   | -----  |
| <input checked="" type="checkbox"/> | Anti-HTLV I/II:  | -----  |
| <input checked="" type="checkbox"/> | HBsAg:           | -----  |
| <input checked="" type="checkbox"/> | Anti-CMV:        | -----  |
| <input checked="" type="checkbox"/> | Syphilis:        | -----  |
| <input checked="" type="checkbox"/> | HBsAb:           | -----  |
| <input checked="" type="checkbox"/> | EBV (VCA) (IgG): | -----  |
| <input checked="" type="checkbox"/> | EBV (VCA) (IgM): | -----  |
| <input checked="" type="checkbox"/> | EBNA:            | -----  |
| <input checked="" type="checkbox"/> | Chagas:          | -----  |
|                                     | CMV IgM:         | -----  |
|                                     | HBcAB IgM:       | -----  |
| <input checked="" type="checkbox"/> | HIV NAT:         | -----  |
| <input checked="" type="checkbox"/> | HCV NAT:         | -----  |
| <input checked="" type="checkbox"/> | HBV NAT:         | -----  |
| <input checked="" type="checkbox"/> | Toxo Ab IgG:     | -----  |
|                                     | Toxo Ab IgM:     | -----  |
| <input checked="" type="checkbox"/> | WNV:             | -----  |
| <input checked="" type="checkbox"/> | WNV NAT:         | -----  |
| <input checked="" type="checkbox"/> | HIV Ag/Ab Combo: | -----  |
| <input checked="" type="checkbox"/> | HTLV NAT:        | -----  |
| <input checked="" type="checkbox"/> | Chagas NAT:      | -----  |
| <input checked="" type="checkbox"/> | Strongyloides:   | -----  |
|                                     | -----:           | -----  |
|                                     | -----:           | -----  |

\*Note: UNET upload only includes test results for tests that are available in UNET at time of upload.

Comments:  
-----

Patient Name:Releaseone Organ

UNOS #:-----

ABO:-----

OPO #:-----

MRN:654321

EKG

Not Performed:

☐

Result:

-----

Date-Time:

--/--/---- --:--

Consulting Physician:

-----

Rhythm:

-----

Heart Rate:

-- BPM

Interpretation:

-----

Patient Name: Releaseone Organ

ABO: -----

UNOS #: -----

OPO #: -----

MRN: 654321

ECHOCARDIOGRAM

Type: -----

Date-Time: --/--/---- --:--

Consulting Physician: -----

Interpretation: -----

CVP: --EF: --BP: -- / --HR: --Cardiac Rhythm: --

CO: --CI: --PAWP: --SF: --PA Pressure: --

PRESSORS

Pressors: --

MEASUREMENTS

Estimated LV Ejection Fraction: -- %

LV End Systolic Dimension LVIDS: -- --

LV End Diastolic Dimension LVIDd: -- --

Vent. Septal Wall Thickness IVSd: -- --

LV Posterior Wall Thickness LVPWd: -- --

Comments: -----



Patient Name:Releaseone Organ

ABO:-----

UNOS #:-----

OPO #:-----

MRN:654321

ANGIOGRAPHY

Not Performed:

☐

Type of Cardiac Catheterization:

-----

Volume Of Dye:

-----

Date-Time:

--/--/---- --:--

Consulting Physician:

-----

Interpretation:

-----

Patient Name:Releaseone Organ

ABO:-----

UNOS #:-----

OPO #:-----

MRN:654321

CXR

|                 |                 |         |                                          |
|-----------------|-----------------|---------|------------------------------------------|
| Chest X-ray:    | -----           | Note:   | This value will be uploaded to DonorNet. |
| Date-Time:      | --/--/--- --:-- | Result: | -----                                    |
| MD:             | -----           |         |                                          |
| Interpretation: | -----           |         |                                          |

Patient Name: Releaseone Organ  
ABO: -----

UNOS #: -----  
OPO #: -----  
MRN: 654321

BRONCHOSCOPY

|                                                       |                                            |
|-------------------------------------------------------|--------------------------------------------|
| Not Performed:                                        | <input type="checkbox"/>                   |
| Date-Time: --/--/---- --:--                           | Consulting Physician: -----                |
| Interpretation: -----                                 |                                            |
| Bronchial washings sent for culture/gram stain? ----- | If performed, see culture page for results |

Patient Name:Releaseone Organ

ABO:-----

UNOS #:-----

OPO #:-----

MRN:654321

LUNG MEASUREMENT

Not Performed: ☐

Chest X-ray utilized for measurement:--/--/--- --:'--

Length of Right Lung:-- cms

Length of Left Lung:-- cms

Aortic Knob Width:-- cms

Diaphragm width:-- cms

Chest Circ./Landmark:-- cms

Dist. RCPA to LCPA:-- cms

Age:40 Years

Gender:Male

Height:-----

Total Lung Capacity:Not Enough Information

Vital Capacity:Not Enough Information

Additional Comments:-----

Patient Name:Releaseone Organ

ABO:-----

UNOS #:-----

OPO #:-----

MRN:654321

ARTERIAL BLOOD GASES

| Date-Time        | pH    | pCO2 | pO2 | BE | HCO3 | O2Sat | FiO2 | Rate | TV | PEEP | PiP | Mode |
|------------------|-------|------|-----|----|------|-------|------|------|----|------|-----|------|
| --/--/---- --:-- | --    | --   | --  | -- | --   | --    | --   | --   | -- | --   | --  | --   |
| OPO/Hospital:    | ----- |      |     |    |      |       |      |      |    |      |     |      |
| Comments:        | ----- |      |     |    |      |       |      |      |    |      |     |      |

Patient Name: Releaseone Organ  
ABO: -----

UNOS #: -----  
OPO #: -----  
MRN: 654321

DIAGNOSTIC TESTS

Type: -----  
Date-Time: --/--/---- --:--  
Diagnostic evaluation/results:  
-----

Patient Name:Releaseeone Organ

ABO:-----

UNOS #:-----

OPO #:-----

MRN:654321

INTRAOPERATIVE MANAGEMENT

HOSPITAL INFORMATION

Is this a DCD Recovery?Yes

Lifebanc Recovery Center?Yes

Enter OR Date-Time:--/--/---- --:--

Incision Date-Time:--/--/---- --:--

Crossclamp Date-Time:--/--/---- --:--

Exit OR Date-Time:--/--/---- --:--

Avg BP:--/--

Low BP:--/--

High BP:--/--

Duration:-----

Duration Type:--

Duration:-----

Duration Type:--

Avg HR:--

Low HR:--

High HR:--

Duration:-----

Duration Type:--

Duration:-----

Duration Type:--

Avg SpO2:--

Low SpO2:--

High SpO2:--

Duration:-----

Duration Type:--

Duration:-----

Duration Type:--

Last hour urine output:--ml

Total urine output in OR:--ml

Average urine:--

Any Extracorporeal Support Given (ECMO, etc.):--

MEDICATIONS

Heparin:☐

Mannitol:☐

Lasix:☐

Solumedrol:☐

T4:☐

Thorazine:☐

TPA:☐

Other Medication 1:☐

Other Medication 2:☐

Other Medication 3:☐

Other Medication 4:☐

Vasodilators:☐

Pressors:☐

Blood products 1:☐

Blood products 2:☐

Crystalloids:☐

Comments:-----

Patient Name: Releaseone Organ UNOS #: -----  
ABO: ----- OPO #: -----  
MRN: 654321

OR TEAMS

| HEART                                                                                       | HEART / LUNG                 | RIGHT LUNG                        | LEFT LUNG                    |
|---------------------------------------------------------------------------------------------|------------------------------|-----------------------------------|------------------------------|
| Recovering Surgeon:<br>-- --                                                                | Recovering Surgeon:<br>-- -- | Recovering Surgeon:<br>-- --      | Recovering Surgeon:<br>-- -- |
| Assistant Surgeon:<br>-- --                                                                 | Assistant Surgeon:<br>-- --  | Assistant Surgeon:<br>-- --       | Assistant Surgeon:<br>-- --  |
| Other Team Members:<br>-- --                                                                | Other Team Members:<br>-- -- | Other Team Members:<br>-- --      | Other Team Members:<br>-- -- |
| LIVER                                                                                       | KIDNEY                       | PANCREAS                          | INTESTINE                    |
| Recovering Surgeon:<br>-- --                                                                | Recovering Surgeon:<br>-- -- | Recovering Surgeon:<br>-- --      | Recovering Surgeon:<br>-- -- |
| Assistant Surgeon:<br>-- --                                                                 | Assistant Surgeon:<br>-- --  | Assistant Surgeon:<br>-- --       | Assistant Surgeon:<br>-- --  |
| Other Team Members:<br>-- --                                                                | Other Team Members:<br>-- -- | Other Team Members:<br>-- --      | Other Team Members:<br>-- -- |
| ANESTHESIA                                                                                  | CIRCULATOR                   | SCRUBS                            | OTHERS                       |
| Anesthesia 1:<br>-- --                                                                      | Circulator 1:<br>-- --       | Scrubs 1:<br>-- --                | Others 1:<br>-- --           |
| Anesthesia 1 Title:<br>-----                                                                | Circulator 1 Title:<br>----- | Scrubs 1 Title:<br>-----          | Others 1 Title:<br>-----     |
| Anesthesia 2:<br>-- --                                                                      | Circulator 2:<br>-- --       | Scrubs 2:<br>-- --                | Others 2:<br>-- --           |
| Anesthesia 2 Title:<br>-----                                                                | Circulator 2 Title:<br>----- | Scrubs 2 Title:<br>-----          | Others 2 Title:<br>-----     |
| Anesthesia 3:<br>-- --                                                                      | Circulator 3:<br>-- --       | Scrubs 3:<br>-- --                | Others 3:<br>-- --           |
| Anesthesia 3 Title:<br>-----                                                                | Circulator 3 Title:<br>----- | Scrubs 3 Title:<br>-----          | Others 3 Title:<br>-----     |
| OPO STAFF 1                                                                                 | OPO STAFF 2                  | OPO STAFF 3                       | OPO STAFF 4                  |
| -----                                                                                       | -----                        | -----                             | -----                        |
| Anesthesia requirements given to: -----                                                     |                              | Date-Time Given: --/--/---- --:-- |                              |
| Abdominal and chest cavities visually inspected for contraindications to donation by: ----- |                              |                                   |                              |
| Comments:<br>-----                                                                          |                              |                                   |                              |



RENAL DATA

|                                                           |                                                          |
|-----------------------------------------------------------|----------------------------------------------------------|
| XClamp Date-Time: --/--/--- --:--                         | Warm Ischemic Time: -----                                |
| Initial Flush (Insitu): --                                |                                                          |
| Backtable Flush: --                                       |                                                          |
| Storage Solution: -----                                   | Volume: ----- ml                                         |
| Storage Solution Additives: -----                         |                                                          |
| Typing materials:                                         |                                                          |
| Nodes: <input type="checkbox"/>                           | Spleen: <input type="checkbox"/>                         |
| Blood Clot: <input type="checkbox"/>                      | Other: <input type="checkbox"/>                          |
| Right kidney pump device: -----                           | Left kidney pump device: -----                           |
| Right kidney pump solution: -----                         | Left kidney pump solution: -----                         |
| Right kidney pump solution additives: -----               | Left kidney pump solution additives: -----               |
| Right kidney transferred to transplant center on pump: -- | Left kidney transferred to transplant center on pump: -- |
| Recovering Surgeon: -----                                 | Assistant Surgeon: -----                                 |
| Recovery Program: -----                                   |                                                          |
| Sent en bloc: --                                          |                                                          |
| Match KDPI: -- %                                          | Terminal KDPI: -- %                                      |
| Comments: -----                                           |                                                          |

| RIGHT KIDNEY                                                                      | RIGHT              | RENAL ANATOMY           | LEFT               | LEFT KIDNEY |
|-----------------------------------------------------------------------------------|--------------------|-------------------------|--------------------|-------------|
|                                                                                   | --                 | Aortic Plaque           | --                 |             |
|                                                                                   | --                 | Arterial Plaque         | --                 |             |
| 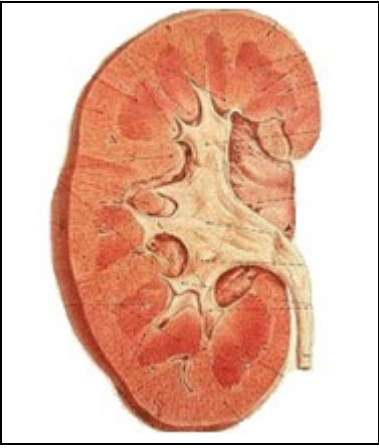 | -- ①               | Infarcted area(s)       | ① --               |             |
|                                                                                   | -- ②               | Capsule Tear            | ② --               |             |
|                                                                                   | -- ③               | Subcapsular hematoma(s) | ③ --               |             |
|                                                                                   | -- ④               | Cysts/Discoloration     | ④ --               |             |
|                                                                                   | --                 | Fat cleaned             | --                 |             |
|                                                                                   | --                 | Pumped                  | --                 |             |
|                                                                                   | -- ⑤               | Biopsy                  | ⑤ --               |             |
|                                                                                   | Biopsy Type: ----- |                         | Biopsy Type: ----- |             |

| RIGHT KIDNEY ANATOMY                       |                    |              |  | LEFT KIDNEY ANATOMY                       |                    |              |  |
|--------------------------------------------|--------------------|--------------|--|-------------------------------------------|--------------------|--------------|--|
| Kidney Recovered? --                       |                    |              |  | Kidney Recovered? --                      |                    |              |  |
| Date-Time Recovered: --/--/--- --:--       |                    |              |  | Date-Time Recovered: --/--/--- --:--      |                    |              |  |
| Kidney Size                                |                    |              |  | Kidney Size                               |                    |              |  |
| Length: -- cm                              | Width: -- cm       | Depth: -- cm |  | Length: -- cm                             | Width: -- cm       | Depth: -- cm |  |
| Arteries #: --                             | Distance apart: -- | --           |  | Arteries #: --                            | Distance apart: -- | --           |  |
|                                            | Distance apart: -- | --           |  |                                           | Distance apart: -- | --           |  |
| Aortic Cuff: --                            |                    |              |  | Aortic Cuff: --                           |                    |              |  |
| Right Kidney Arteries On a Common Cuff? -- |                    |              |  | Left Kidney Arteries On a Common Cuff? -- |                    |              |  |
| Length: -- cm                              | -- cm              | -- cm        |  | Length: -- cm                             | -- cm              | -- cm        |  |
| Diameter: -- mm                            | -- mm              | -- mm        |  | Diameter: -- mm                           | -- mm              | -- mm        |  |
| Comments: -----                            |                    |              |  | Comments: -----                           |                    |              |  |

Patient Name: Releaseone Organ

ABO: -----

UNOS #: -----

OPO #: -----

MRN: 654321

RENAL DATA

|                                                                                                                                                                                                                                        |                                                                                                                                                                                                                                                         |
|----------------------------------------------------------------------------------------------------------------------------------------------------------------------------------------------------------------------------------------|---------------------------------------------------------------------------------------------------------------------------------------------------------------------------------------------------------------------------------------------------------|
| <div>Veins #: -- Distance apart: -- -- Distance apart: ----- --</div> <div>Full Vena Cava: --</div> <div>Length: -- cm Width: -- cm Depth: -- cm</div> <div>Diameter: -- mm Width: -- mm Depth: -- mm</div> <div>Comments: -----</div> | <div>Veins #: -- Distance apart: -- -- Distance apart: ----- --</div> <div>Full Vena Cava: -- Cuff of Cava: --</div> <div>Length: -- cm Width: -- cm Depth: -- cm</div> <div>Diameter: -- mm Width: -- mm Depth: -- mm</div> <div>Comments: -----</div> |
| <div>Ureter: -----</div> <div>Length: -- cm -- cm -- cm</div> <div>Comments: -----</div>                                                                                                                                               | <div>Ureter: --</div> <div>Length: -- cm -- cm -- cm</div> <div>Comments: -----</div>                                                                                                                                                                   |
| <div>Abnormalities: --</div>                                                                                                                                                                                                           | <div>Abnormalities: --</div>                                                                                                                                                                                                                            |
| <div>Surgical Damage: --</div> <div>Additional Surgeon Comments: -----</div>                                                                                                                                                           | <div>Surgical Damage: --</div> <div>Additional Surgeon Comments: -----</div>                                                                                                                                                                            |
| <div>Pump requested by: -----</div> <div>Reason: -----</div>                                                                                                                                                                           | <div>Pump requested by: -----</div> <div>Reason: -----</div>                                                                                                                                                                                            |
| <div>Laterality Marked? --</div>                                                                                                                                                                                                       | <div>Laterality Marked? --</div>                                                                                                                                                                                                                        |
| <div>RIGHT KIDNEY BIOPSY INFORMATION</div>                                                                                                                                                                                             |                                                                                                                                                                                                                                                         |
| <div>Glomeruli Seen: -- Glomeruli Sclerosed: --</div> <div>Glomeruli Sclerosis: --</div> <div>Kidney Interstitial Fibrosis: -----</div> <div>Kidney Inflammation: -----</div> <div>Comments: -----</div>                               | <div>Glomeruli Seen: -- Glomeruli Sclerosed: --</div> <div>Glomeruli Sclerosis: --</div> <div>Kidney Interstitial Fibrosis: -----</div> <div>Kidney Inflammation: -----</div> <div>Comments: -----</div>                                                |
| <div>Kidney Arterial Sclerosis: --</div>                                                                                                                                                                                               | <div>Kidney Arterial Sclerosis: --</div>                                                                                                                                                                                                                |
| <div>Kidney Vascular Changes: -----</div> <div>Comments: -----</div>                                                                                                                                                                   | <div>Kidney Vascular Changes: -----</div> <div>Comments: -----</div>                                                                                                                                                                                    |
| <div>Other Pathology or Anatomic Abnormalities: -----</div> <div>Kidney Pathologist Name: -----</div> <div>Phone Number: -----</div> <div>Date-Time Results Reported: --/--/--- --:--</div>                                            | <div>Other Pathology or Anatomic Abnormalities: -----</div> <div>Kidney Pathologist Name: -----</div> <div>Phone Number: -----</div> <div>Date-Time Results Reported: --/--/--- --:--</div>                                                             |
| <div>COMMENTS</div> <div>-----</div>                                                                                                                                                                                                   |                                                                                                                                                                                                                                                         |

Patient Name: Releaseone Organ

UNOS #: -----

ABO: -----

OPO #: -----

MRN: 654321

LIVER DATA

Liver Recovered?

--

Warm Ischemic Time:

-----

Initial Flush Solution:

☐

Aortic Flush

Start Time: --:--

Volume: ----- ml

Char: --

☐

Portal Flush

Start Time: --:--

Volume: ----- ml

Char: --

Flush Additives:

-----

Backtable Flush Solution:

☐

Aortic Flush

Start Time: --:--

Volume: ----- ml

Char: --

☐

Portal Flush

Start Time: --:--

Volume: ----- ml

Char: --

Backtable Flush Additives:

-----

Storage Solution:

-----

Volume: ----- ml

Storage Solution Additives:

-----

Typing materials:

Nodes: ☐

Spleen: ☐

Blood Clot: ☐

Other: ☐

Liver Machine Perfusion:

--

Vessels Sent:

--

Anatomical Abnormality:

--

Surgical Damage:

No

Capsule Torn:

--

Hematoma:

--

Gall Bladder Incised:

--

Gall Bladder Flushed:

--

Replaced Left Hepatic:

--

Replaced Right Hepatic:

--

Biopsy:

--

Recovering Surgeon:

-----

Assistant Surgeon: -----

Recovery Program:

-----

Comments:

-----

Patient Name: Releaseone Organ  
ABO: -----

UNOS #: -----  
OPO #: -----  
MRN: 654321

HEART DATA

|                             |                          |                    |                          |                                      |
|-----------------------------|--------------------------|--------------------|--------------------------|--------------------------------------|
| Heart Recovered?            | --                       |                    |                          |                                      |
| Initial Flush:              | -----                    | Volume:            | ----- ml                 | Char: --                             |
| Flush Additives:            | -----                    |                    |                          |                                      |
| Backtable Flush Solution:   | -----                    | Volume:            | ----- ml                 |                                      |
| Backtable Flush Additives:  | -----                    |                    |                          |                                      |
| Storage Solution:           | -----                    | Volume:            | ----- ml                 |                                      |
| Storage Solution Additives: | -----                    |                    |                          |                                      |
| Typing materials:           |                          |                    |                          |                                      |
| Nodes:                      | <input type="checkbox"/> | Spleen:            | <input type="checkbox"/> | Blood Clot: <input type="checkbox"/> |
| Heart Machine Perfusion:    | --                       | Other:             | <input type="checkbox"/> |                                      |
| Anatomical Abnormality:     | --                       |                    |                          |                                      |
| Surgical Damage:            | --                       |                    |                          |                                      |
| Evidence/CV Disease:        | --                       |                    |                          |                                      |
| Recovering Surgeon:         | -----                    | Assistant Surgeon: | -----                    |                                      |
| Recovery Program:           | -----                    |                    |                          |                                      |
| Comments:                   | -----                    |                    |                          |                                      |

Patient Name: Releaseone Organ

ABO: -----

UNOS #: -----

OPO #: -----

MRN: 654321

LUNG DATA

Initial Flush: -----

Volume: ----- ml

Char: -----

Flush Additives: -----

Backtable Flush: -----

Storage Solution: -----

Volume: ----- ml

Storage Solution Additives: -----

Typing materials:

Nodes: ☐

Spleen: ☐

Blood Clot: ☐

Other: ☐

RIGHT LUNG

Right Lung Recovered? -----

Anatomical Abnormality: --

Surgical Damage: --

Recovering Surgeon: -----

Recovery Program: -----

Right Lung Perfusion Machine Intended or Performed: --

Comments: -----

LEFT LUNG

Left Lung Recovered? -----

Anatomical Abnormality: --

Surgical Damage: --

Recovering Surgeon: -----

Recovery Program: -----

Left Lung Perfusion Machine Intended or Performed: --

Comments: -----

Patient Name: Releaseone Organ

UNOS #: -----

ABO: -----

OPO #: -----

MRN: 654321

PANCREAS DATA

Pancreas Recovered? --

Warm Ischemic Time: -----

Initial Flush (Aortic): Start Time: --:-- Solution: ----- Volume: ----- Char: --

Flush Additives: -----

Backtable Flush (Splenic): --

SMA Flush (backtable): --

Storage Solution: ----- Volume: -----

Storage Solution Additives: -----

Typing materials:

Nodes: ☐

Spleen: ☐

Blood Clot: ☐

Other: ☐

Whole: --

Celiac: --

Spleen Attached: --

Portal Vein: --

Vessels Sent: --

Comments: -----

Anatomical Abnormality: --

Comments: -----

Surgical Damage: --

Comments: -----

Bowel prep: -----

Recovering Surgeon: -----

Assistant Surgeon: -----

Recovery Program: -----

Comments: -----

Patient Name:Releaseone Organ

ABO:-----

UNOS #:-----

OPO #:-----

MRN:654321

INTESTINE DATA

Intestine Recovered?--

Initial Flush:-----

Flush Additives:-----

Backtable Flush:--

Storage Solution:-----

Storage Solution Additives:-----

Typing materials:

Nodes:☐

Spleen:☐

Blood Clot:☐

Other:☐

Vessels Sent:--

Anatomical Abnormality:--

Surgical Damage:--

Bowel Prep:--

Recovering Surgeon:-----

Assistant Surgeon:-----

Recovery Program:-----

Comments:-----

Volume:-----

Char:--

Volume:-----

Comments:-----

Comments:-----

Comments:-----

Patient Name: Releaseone Organ  
ABO: -----  
UNOS #: -----  
OPO #: -----  
MRN: 654321

HOSPITAL PERSONNEL FORM

ICU STAFF

|                               |                               |                               |
|-------------------------------|-------------------------------|-------------------------------|
| MD #1: (Sal., First, Last)    | MD #2: (Sal., First, Last)    | Nurse #1: (Sal., First, Last) |
| -----                         | -----                         | -----                         |
| Nurse #2: (Sal., First, Last) | Nurse #3: (Sal., First, Last) | Nurse #4: (Sal., First, Last) |
| -----                         | -----                         | -----                         |
| Other #1: (Sal., First, Last) | Other #2: (Sal., First, Last) | Other #3: (Sal., First, Last) |
| -----                         | -----                         | -----                         |
| Other #1 Role: -----          | Other #2 Role: -----          | Other #3 Role: -----          |
| Other #4: (Sal., First, Last) | Other #5: (Sal., First, Last) | Other #6: (Sal., First, Last) |
| -----                         | -----                         | -----                         |
| Other #4 Role: -----          | Other #5 Role: -----          | Other #6 Role: -----          |

PHYSICIANS

|                  |                     |                     |
|------------------|---------------------|---------------------|
| Attending: ----- | Declaring #1: ----- | Declaring #2: ----- |
|------------------|---------------------|---------------------|

CONSULTS

|                                  |                                  |                                  |
|----------------------------------|----------------------------------|----------------------------------|
| Cardiac: (Sal., First, Last)     | Pulmonary: (Sal., First, Last)   | Pathologist: (Sal., First, Last) |
| -----                            | -----                            | -----                            |
| Other MD #1: (Sal., First, Last) | Other MD #2: (Sal., First, Last) | Other MD #3: (Sal., First, Last) |
| -----                            | -----                            | -----                            |
| Other MD #4: (Sal., First, Last) | Other MD #5: (Sal., First, Last) | Other MD #6: (Sal., First, Last) |
| -----                            | -----                            | -----                            |

OR STAFF

|                                  |                               |                               |
|----------------------------------|-------------------------------|-------------------------------|
| Anesthesia: (Sal., First, Last)  | CRNA: (Sal., First, Last)     | Scrub: (Sal., First, Last)    |
| -----                            | -----                         | -----                         |
| Circulation: (Sal., First, Last) | Other #1: (Sal., First, Last) | Other #2: (Sal., First, Last) |
| -----                            | -----                         | -----                         |
| Other #3: (Sal., First, Last)    | Other #1 Role: -----          | Other #2 Role: -----          |
| -----                            | Other #4: (Sal., First, Last) | Other #5: (Sal., First, Last) |
| -----                            | -----                         | -----                         |
| Other #3 Role: -----             | Other #4 Role: -----          | Other #5 Role: -----          |

ER STAFF

|                                  |                                  |                                  |
|----------------------------------|----------------------------------|----------------------------------|
| ER Staff #1: (Sal., First, Last) | ER Staff #2: (Sal., First, Last) | ER Staff #3: (Sal., First, Last) |
| -----                            | -----                            | -----                            |

OTHER

|                               |                               |                                                 |
|-------------------------------|-------------------------------|-------------------------------------------------|
| Chaplain: (Sal., First, Last) | Coroner: (Sal., First, Last)  | Family Support Coordinator: (Sal., First, Last) |
| -----                         | -----                         | -----                                           |
| Other #1: (Sal., First, Last) | Other #2: (Sal., First, Last) | Other #3: (Sal., First, Last)                   |
| -----                         | -----                         | -----                                           |
| Other #1 Role: -----          | Other #2 Role: -----          | Other #3 Role: -----                            |



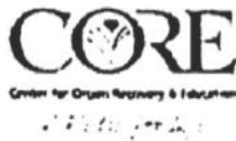

# Redacted

FINAL COPY

Donor: N/A, N/A

Acc #:

110724

## SAMPLE SEROLOGIES

|                                                                                                                                                     |              |                            |
|-----------------------------------------------------------------------------------------------------------------------------------------------------|--------------|----------------------------|
| ABO/Rh                                                                                                                                              |              | Redacted Redacted          |
| ABO                                                                                                                                                 | A            |                            |
| A1 Lectin                                                                                                                                           | Positive     |                            |
| Rh                                                                                                                                                  | Negative (-) |                            |
| <i>Notes: ABO/Rh confirmed by 2nd technician</i>                                                                                                    |              |                            |
| Hepatitis B Core Total Ab (IgG/IgM)                                                                                                                 |              | Redacted Redacted Redacted |
| Hep B Core Total Ab (Results)                                                                                                                       | Nonreactive  | Nonreactive                |
| Method: ELISA Kit: ORTHO® Hbc ELISA<br>Manufacturer: Ortho Clinical Diagnostics                                                                     |              |                            |
| Procleix Ultrio                                                                                                                                     |              | Redacted Redacted          |
| Procleix Ultrio                                                                                                                                     | Nonreactive  | Non-Reactive               |
| Method: Transcription-Mediated Amplification<br>Kit: Procleix® Ultrio® Assay (HIV-1/HBV/HCV NAT)<br>Manufacturer: Grifols Diagnostic Solutions Inc. |              |                            |
| Hepatitis B Surface Antigen                                                                                                                         |              | Redacted Redacted          |
| Hep B Surface Antigen (Result)                                                                                                                      | Nonreactive  | Nonreactive                |
| Method: EIA Kit: GS HBsAg EIA 3.0<br>Manufacturer: Bio-Rad Laboratories                                                                             |              |                            |
| HCV Ab                                                                                                                                              |              | Redacted Redacted Redacted |
| HCV Ab (Result)                                                                                                                                     | Nonreactive  | Nonreactive                |
| Method: ELISA Kit: ORTHO® HCV Version 3.0 ELISA<br>Manufacturer: Ortho Clinical Diagnostics                                                         |              |                            |
| HIV 1-2 Plus O Ab                                                                                                                                   |              | Redacted Redacted          |
| HIV 1-2 Plus O Ab (Result)                                                                                                                          | Nonreactive  | Nonreactive                |
| Method: EIA Kit: GS HIV-1/HIV-2 Plus O EIA<br>Manufacturer: Bio-Rad Laboratories                                                                    |              |                            |
| CMV Total Ab (IgG/IgM)                                                                                                                              |              | Redacted Redacted          |
| CMV Total Ab (Results)                                                                                                                              | Negative     | Negative                   |
| Method: Solid phase red cell adherence Kit: Capture-CMV®<br>Manufacturer: Immucor, Inc.                                                             |              |                            |
| RPR                                                                                                                                                 |              | Redacted Redacted          |
| RPR                                                                                                                                                 | Nonreactive  | Nonreactive                |
| Method: Nontraconemal Flocculation Kit: ASi RPR Card Test/ASiManager-AT<br>Manufacturer: Arlington Scientific, Inc.                                 |              |                            |
| EBV-VCA IgG Ab                                                                                                                                      |              | Redacted Redacted          |

Originally Reported On: Redacted

Printed: Redacted

Page 1 of 2

Accession: Redacted Donor ID: Redacted

Lab Results For: N/A N/A

STAT[S] Corrected [C] Added [A]

| Test Name                                                               | Result   | Units | Flag     | Reference Range            |
|-------------------------------------------------------------------------|----------|-------|----------|----------------------------|
| EBV-VCA IgG Ab                                                          |          |       |          | Redacted Redacted Redacted |
| EBV-VCA IgG Ab (Result)                                                 | Positive |       | ABNORMAL |                            |
| Method: Indirect Chemiluminescence Immunoassay Kit: Liason® VCA IgG     |          |       |          |                            |
| Manufacturer: DiaSorin, Inc                                             |          |       |          |                            |
| EBV-VCA IgM Ab                                                          |          |       |          | Redacted Redacted          |
| EBV-VCA IgM Ab (Result)                                                 | Negative |       |          |                            |
| Method: Indirect Chemiluminescence Immunoassay Kit: Liason® EBV IgM     |          |       |          |                            |
| Manufacturer: DiaSorin, Inc                                             |          |       |          |                            |
| Toxoplasma IgG Ab                                                       |          |       |          | Redacted Redacted Redacted |
| Toxoplasma IgG (Result)                                                 | Negative |       |          |                            |
| Method: Indirect Chemiluminescence Immunoassay Kit: Liason® Toxo IgG II |          |       |          |                            |
| Manufacturer: DiaSorin, Inc                                             |          |       |          |                            |
| Toxoplasma IgM Ab                                                       |          |       |          | Redacted Redacted          |
| Toxoplasma IgM (Result)                                                 | Negative |       |          |                            |
| Method: Indirect Chemiluminescence Immunoassay Kit: Liason® Toxo IgM II |          |       |          |                            |
| Manufacturer: DiaSorin, Inc                                             |          |       |          |                            |

**Notes:** Red Lot: 8303625 Exp. Date: 11/30/2020  
 EDTA Lot: 8276648 Exp. Date: 10/31/2020  
 EDTA Lot: 8187653 Exp. Date: 07/31/2020

All Positive/Reactive Results are Repeated per Manufacturer Insert. A minimum of 1 ml Serum & EDTA Plasma archived when available.  
 Effective 9-1-2015 Syphilis (RPR) Testing is performed on FDA Cleared ASiManager-AT.

Originally Reported On: Redacted  
 Printed: Redacted  
 Page 2 of 2

STAT[S] Corrected [C] Added [A]

Accession: Redacted Donor ID: Redacted  
 Lab Results For: N/A N/A
